# Supplementary material for: Microneedle arrays coated with Middle East respiratory syndrome coronavirus DNA vaccine via electrospray deposition
Source: Royal Society of Chemistry journal article supplement (doi:10.1039/d4sm01322k), 2025-01-01
Supplement: d4sm01322k1.xlsx [file d4sm01322k1.xlsx]

## Sheet: DNA-Only
Normalized Depth (nm)	Normalized Load (mN)
-3.08532	-0.055492
-2.61757	-0.051622
-2.18891	-0.047818
-1.75238	-0.043856
-1.47645	-0.03978
-1.24535	-0.035532
-0.921937	-0.031578
-0.539484	-0.027552
-0.115135	-0.023588
-0.0668648	-0.019614
-0.0476371	-0.015682
-0.0314948	-0.011732
-0.0244685	-0.007776
-0.0107606	-0.003792
0	0
0.0139134	0.004076
0.029865	0.008112
0.0299458	0.011984
0.0450859	0.015936
0.0494561	0.019908
0.0719769	0.02
0.0954139	0.020002
0.100542	0.031052
0.109796	0.04336
0.121	0.05531
0.129864	0.068986
0.139524	0.081268
0.149152	0.093278
0.160456	0.104724
0.176906	0.116406
0.194969	0.128572
0.212521	0.140216
0.228524	0.151474
0.24686	0.163866
0.261707	0.175238
0.275853	0.186634
0.292212	0.198988
0.303768	0.210284
0.317937	0.221066
0.334546	0.232486
0.348364	0.244478
0.359055	0.255396
0.370149	0.266894
0.38087	0.278542
0.394349	0.290212
0.402896	0.301406
0.414474	0.313
0.424476	0.323964
0.433385	0.335294
0.449507	0.348126
0.45742	0.359956
0.467712	0.371296
0.477521	0.38315
0.48601	0.39537
0.496898	0.407282
0.503986	0.418754
0.512228	0.430074
0.522441	0.441432
0.529392	0.45267
0.538845	0.46451
0.547286	0.47558
0.554588	0.486474
0.56495	0.498176
0.573492	0.509952
0.582396	0.521186
0.591822	0.53293
0.598695	0.54455
0.603792	0.556122
0.612485	0.567962
0.622533	0.579514
0.627532	0.591218
0.633962	0.602886
0.640154	0.614546
0.647917	0.626632
0.656593	0.638572
0.663691	0.649442
0.667896	0.661748
0.677897	0.675188
0.684319	0.686546
0.69131	0.69766
0.698879	0.70972
0.705606	0.72099
0.709583	0.732168
0.718855	0.743282
0.723618	0.754474
0.731057	0.765688
0.740651	0.777982
0.747326	0.789186
0.754616	0.801
0.761159	0.812726
0.767389	0.824444
0.773805	0.835898
0.780001	0.847198
0.785933	0.8592
0.79264	0.871692
0.7962	0.8833
0.802065	0.894324
0.807097	0.90641
0.813545	0.919732
0.819961	0.931746
0.825411	0.94397
0.827917	0.955002
0.834614	0.966946
0.846145	0.979428
0.848882	0.990992
0.851952	1
0.999724	1
1	0.989452
0.999578	0.979432
0.996448	0.969414
0.996122	0.958906
0.995518	0.94794
0.995719	0.937068
0.993937	0.926408
0.991919	0.915756
0.989882	0.903958
0.989985	0.892432
0.990681	0.88082
0.988655	0.869204
0.987641	0.858278
0.985231	0.848308
0.985786	0.837872
0.984996	0.826818
0.983443	0.816562
0.984916	0.80619
0.984048	0.796172
0.982316	0.78614
0.979812	0.775636
0.976009	0.765074
0.978375	0.75456
0.977573	0.74373
0.977643	0.732636
0.97662	0.72204
0.974672	0.711056
0.974591	0.699422
0.973876	0.688538
0.971793	0.678228
0.969033	0.667044
0.968866	0.655586
0.966812	0.644192
0.965089	0.632586
0.96378	0.621794
0.961892	0.611104
0.960745	0.599934
0.957883	0.588834
0.958048	0.577624
0.955181	0.566424
0.955609	0.5554
0.952513	0.544474
0.951404	0.533254
0.949392	0.522326
0.948148	0.511322
0.948451	0.501
0.946339	0.49034
0.945715	0.479614
0.945117	0.469022
0.94277	0.458176
0.940316	0.447624
0.939399	0.437136
0.937992	0.42652
0.936382	0.415466
0.935677	0.404372
0.933076	0.393608
0.929531	0.382618
0.92803	0.372024
0.925482	0.361602
0.922362	0.349786
0.920722	0.337972
0.91849	0.326436
0.918272	0.315014
0.913835	0.303344
0.911944	0.292026
0.908822	0.281296
0.904728	0.270698
0.901874	0.260006
0.900907	0.249216
0.897288	0.238502
0.895828	0.2278
0.893986	0.217088
0.890455	0.206328
0.887396	0.195642
0.883579	0.18503
0.87826	0.1742
0.872636	0.163382
0.869193	0.152638
0.866219	0.141432
0.861785	0.130596
0.855215	0.119902
0.850903	0.109222
0.845807	0.09857
0.841297	0.08785
0.835236	0.077122
0.831231	0.066614
0.822937	0.056322
0.814128	0.045328
0.805152	0.033766
0.795759	0.022208
0.787596	0.012078
0.775415	0.00142
0.76191	0
0	0
0	0
-3.28529	-0.056204
-2.77334	-0.05217
-2.28932	-0.04816
-1.86861	-0.044146
-1.49367	-0.040202
-1.15776	-0.036212
-0.811478	-0.032104
-0.474511	-0.028008
-0.0850876	-0.024086
-0.0665829	-0.020054
-0.0508688	-0.016022
-0.041526	-0.012008
-0.0246134	-0.007958
-0.0168468	-0.003972
0	0
0.00948289	0.004
0.0235763	0.007954
0.0314114	0.011922
0.0429823	0.01596
0.0479154	0.01995
0.0694654	0.02
0.0780509	0.02
0.084224	0.030338
0.0878922	0.041474
0.0972433	0.051974
0.110799	0.06337
0.1241	0.07408
0.138597	0.085268
0.157808	0.09642
0.175859	0.10759
0.197427	0.119182
0.216502	0.131058
0.234351	0.142986
0.248707	0.154544
0.262842	0.166792
0.277902	0.177572
0.290996	0.18858
0.304607	0.199552
0.313682	0.210656
0.325372	0.221804
0.337515	0.232996
0.351103	0.244112
0.362787	0.256994
0.375503	0.26803
0.385185	0.278988
0.394449	0.289686
0.407094	0.302574
0.416736	0.314416
0.428892	0.325758
0.438509	0.336998
0.449021	0.348788
0.460397	0.361342
0.470636	0.37304
0.479778	0.384788
0.48909	0.39707
0.500336	0.40905
0.509658	0.420864
0.52068	0.4323
0.528674	0.443564
0.536238	0.454908
0.543947	0.466484
0.552482	0.477468
0.560373	0.489184
0.565774	0.500818
0.575493	0.512216
0.584606	0.52362
0.593549	0.534986
0.602874	0.546696
0.609815	0.558648
0.615747	0.57024
0.625444	0.581594
0.631877	0.593786
0.640717	0.607398
0.647687	0.618712
0.65396	0.62982
0.659708	0.64071
0.668097	0.653194
0.674618	0.666444
0.684031	0.679666
0.689761	0.690976
0.699713	0.702984
0.703518	0.714986
0.710974	0.726214
0.716985	0.737792
0.725041	0.749582
0.730978	0.760514
0.735882	0.771198
0.740462	0.783702
0.748254	0.794788
0.758101	0.806908
0.765542	0.819384
0.769586	0.830536
0.77766	0.841734
0.780928	0.852926
0.787022	0.86547
0.791379	0.876058
0.798654	0.88812
0.803355	0.900516
0.811698	0.912016
0.814058	0.923768
0.820854	0.935282
0.829398	0.946804
0.832581	0.958586
0.835277	0.970804
0.841148	0.984122
0.849918	0.996496
0.853884	1
0.791377	1
0.790144	0.98962
0.789742	0.97962
0.787381	0.969812
0.786637	0.959896
0.786222	0.949296
0.785778	0.93782
0.785605	0.926938
0.783845	0.916414
0.78232	0.904942
0.781557	0.893798
0.780289	0.882974
0.779149	0.872268
0.777006	0.86176
0.776439	0.85087
0.775721	0.83942
0.775021	0.827992
0.774141	0.817044
0.774342	0.806524
0.773157	0.79641
0.774289	0.786096
0.768371	0.775112
0.768924	0.76417
0.76932	0.753246
0.766423	0.742418
0.766244	0.731194
0.7649	0.720064
0.763896	0.709202
0.762263	0.698284
0.762675	0.687476
0.758543	0.676244
0.757699	0.665264
0.756897	0.654186
0.755411	0.643304
0.755509	0.632388
0.752361	0.621434
0.74842	0.61039
0.748082	0.599492
0.748004	0.588592
0.74551	0.577734
0.745285	0.566866
0.742002	0.556032
0.741126	0.545432
0.739841	0.535622
0.739859	0.525142
0.737461	0.514356
0.736049	0.503466
0.733927	0.4926
0.733208	0.481674
0.731734	0.470606
0.729568	0.459794
0.72666	0.449066
0.726346	0.438232
0.72521	0.428208
0.721914	0.41769
0.721267	0.406818
0.71944	0.395442
0.717402	0.383928
0.717017	0.372592
0.71546	0.36246
0.715579	0.351836
0.710235	0.341232
0.707234	0.33065
0.705732	0.32024
0.703436	0.309672
0.700245	0.29903
0.697247	0.288452
0.695004	0.277774
0.692928	0.267352
0.691182	0.256924
0.688121	0.24633
0.683335	0.234838
0.67793	0.223274
0.675148	0.211768
0.671048	0.200584
0.666809	0.189754
0.662637	0.178772
0.661216	0.16809
0.658099	0.157406
0.65288	0.1466
0.649211	0.136008
0.646951	0.125604
0.643044	0.114968
0.635932	0.10397
0.631068	0.093188
0.627045	0.082614
0.615222	0.071926
0.608236	0.0604
0.599451	0.048618
0.592807	0.036968
0.585399	0.025684
0.574661	0.014398
0.564911	0.003682
0.554378	0
0	0
0	0
-3.58957	-0.055934
-3.23964	-0.051938
-2.90647	-0.047876
-2.46893	-0.043812
-2.05281	-0.039584
-1.60232	-0.035624
-1.1891	-0.031666
-0.795678	-0.027716
-0.402192	-0.023782
-0.0715638	-0.019794
-0.0586942	-0.01584
-0.0316174	-0.011954
-0.0272722	-0.00791
-0.00843997	-0.003892
0	0
0.0166558	0.00414
0.0287111	0.008264
0.03477	0.012424
0.0477235	0.01661
0.0578017	0.020578
0.0551251	0.020578
0.094487	0.02058
0.103007	0.031138
0.109222	0.042076
0.11643	0.052284
0.131606	0.063984
0.146158	0.07496
0.163753	0.086338
0.184758	0.097498
0.20174	0.108832
0.220674	0.1203
0.237053	0.131734
0.252254	0.14357
0.267128	0.154808
0.283924	0.167992
0.297267	0.179256
0.312739	0.190426
0.325402	0.20133
0.336902	0.212002
0.35091	0.222628
0.365538	0.233564
0.376604	0.244878
0.389251	0.256478
0.399099	0.268304
0.409586	0.27937
0.419241	0.290476
0.434261	0.30299
0.444469	0.313626
0.453518	0.325118
0.463263	0.336836
0.475467	0.348584
0.485421	0.360364
0.490953	0.372112
0.504804	0.383628
0.511691	0.394998
0.521387	0.406602
0.530552	0.41869
0.539629	0.430966
0.549248	0.443404
0.558353	0.455756
0.569792	0.467546
0.578353	0.478974
0.5853	0.490492
0.593705	0.502084
0.602623	0.513626
0.608102	0.524868
0.616129	0.536072
0.626363	0.54831
0.631628	0.560706
0.641002	0.57269
0.647261	0.584084
0.653787	0.595368
0.664552	0.607042
0.670874	0.618764
0.676674	0.630422
0.683329	0.641792
0.691979	0.65282
0.699227	0.664142
0.702232	0.6751
0.711426	0.687292
0.719252	0.700752
0.724482	0.712946
0.731351	0.724298
0.735885	0.735548
0.744392	0.747332
0.751157	0.759228
0.75566	0.770732
0.764374	0.782942
0.771588	0.79389
0.775917	0.805094
0.784292	0.817786
0.789968	0.83029
0.798184	0.842526
0.806616	0.854092
0.812185	0.865422
0.817974	0.877084
0.824565	0.88879
0.828168	0.899766
0.835295	0.91068
0.840396	0.922956
0.845652	0.936306
0.852569	0.94829
0.858819	0.960308
0.864082	0.971206
0.868586	0.984048
0.873904	0.995102
0.878198	1
1.04304	1
1.04017	0.989584
1.04083	0.97961
1.04103	0.969386
1.04182	0.95941
1.03927	0.949072
1.03862	0.937646
1.03752	0.92623
1.03618	0.914642
1.0365	0.903428
1.0363	0.891982
1.03476	0.88064
1.03407	0.869634
1.03324	0.85883
1.03098	0.848084
1.03121	0.837402
1.02919	0.825828
1.02895	0.814358
1.02922	0.803108
1.02843	0.793216
1.02669	0.782798
1.02462	0.772022
1.0243	0.761096
1.0223	0.75027
1.02141	0.73943
1.01848	0.72863
1.01878	0.717632
1.01669	0.706834
1.01662	0.696058
1.01474	0.68583
1.01388	0.67483
1.01157	0.664004
1.01154	0.653164
1.00849	0.64232
1.00951	0.631352
1.00748	0.620472
1.00812	0.609886
1.00518	0.599454
1.00497	0.587894
1.00359	0.576476
1.00266	0.565368
1.00032	0.554578
0.99696	0.543992
0.997264	0.533252
0.996324	0.522412
0.99489	0.51141
0.993949	0.500302
0.992397	0.48942
0.989598	0.478432
0.987174	0.467446
0.987874	0.45684
0.984218	0.446416
0.983659	0.435384
0.980186	0.425172
0.980198	0.414628
0.979048	0.40433
0.97619	0.393732
0.973555	0.38237
0.972095	0.3706
0.970416	0.359036
0.967053	0.34744
0.967027	0.336162
0.963352	0.32545
0.96219	0.314586
0.958447	0.303934
0.956378	0.293262
0.955445	0.282632
0.953174	0.27194
0.950292	0.261296
0.948414	0.250584
0.945523	0.23969
0.943015	0.228836
0.939849	0.218292
0.936404	0.207678
0.935638	0.195964
0.93035	0.184814
0.924888	0.174112
0.92334	0.163268
0.918214	0.152652
0.916167	0.141836
0.909388	0.13044
0.903318	0.119442
0.900126	0.10864
0.894789	0.097716
0.889694	0.086842
0.881578	0.076018
0.872848	0.065422
0.864927	0.054844
0.861519	0.04484
0.852563	0.034382
0.843285	0.022748
0.834091	0.011126
0.824331	0
0	0
0	0
-3.62612	-0.056578
-3.30575	-0.05255
-2.81179	-0.048622
-2.33118	-0.04449
-1.74559	-0.040434
-1.24951	-0.036346
-0.945758	-0.032146
-0.554008	-0.027936
-0.150626	-0.024022
-0.0845688	-0.019974
-0.0485409	-0.015932
-0.0303291	-0.012046
-0.0211193	-0.007906
-0.0115091	-0.003996
0	0
0.0147863	0.003914
0.0207888	0.007896
0.0335347	0.011906
0.0412805	0.015902
0.0535234	0.01987
0.0763978	0.02
0.100877	0.02
0.109621	0.031674
0.117151	0.044436
0.124378	0.055092
0.135128	0.06648
0.14651	0.077488
0.162805	0.08864
0.179915	0.099898
0.201965	0.111134
0.218336	0.122738
0.234509	0.135246
0.251472	0.147654
0.265407	0.15996
0.280054	0.172022
0.293978	0.18347
0.308255	0.194522
0.315555	0.205196
0.33004	0.215674
0.346265	0.227218
0.362215	0.240344
0.372747	0.25188
0.383675	0.26329
0.396024	0.274502
0.408457	0.285778
0.416309	0.296658
0.428716	0.30768
0.441319	0.320216
0.451294	0.333098
0.461079	0.344344
0.470559	0.355426
0.48097	0.366972
0.48862	0.378768
0.498314	0.39039
0.507468	0.402578
0.516106	0.414208
0.523635	0.42548
0.532892	0.436798
0.542488	0.447722
0.55094	0.459286
0.55988	0.47081
0.568091	0.481806
0.573198	0.492614
0.582399	0.503766
0.592174	0.515042
0.597607	0.526116
0.606411	0.537664
0.613913	0.548314
0.622743	0.559482
0.6295	0.571592
0.637467	0.584024
0.642193	0.594986
0.650236	0.605858
0.658499	0.616966
0.66379	0.629498
0.673271	0.640186
0.679991	0.651874
0.688018	0.663748
0.694926	0.675254
0.703262	0.68713
0.710661	0.699186
0.716558	0.710634
0.722583	0.721884
0.729744	0.73367
0.735472	0.745776
0.74093	0.757702
0.747057	0.769682
0.752132	0.781666
0.758844	0.792974
0.765899	0.80494
0.772446	0.81601
0.776191	0.827336
0.782416	0.839246
0.78636	0.850748
0.794164	0.862486
0.799762	0.87364
0.806167	0.884386
0.812091	0.89633
0.821524	0.908834
0.827581	0.920592
0.835127	0.932484
0.838664	0.94482
0.845547	0.956394
0.8493	0.967904
0.854927	0.979878
0.85965	0.992812
0.864473	1
1.05849	1
1.05714	0.989848
1.05533	0.979762
1.05477	0.969796
1.05647	0.959756
1.05476	0.949172
1.05263	0.937698
1.05202	0.926126
1.05018	0.915058
1.04993	0.90441
1.04843	0.894062
1.04857	0.88319
1.04606	0.872412
1.04733	0.861586
1.04523	0.850802
1.04479	0.840082
1.04313	0.829016
1.04405	0.818218
1.04179	0.807688
1.03951	0.797814
1.04116	0.787624
1.03915	0.777194
1.03868	0.766266
1.0366	0.755542
1.03472	0.744992
1.03492	0.734304
1.03287	0.723782
1.033	0.713406
1.03124	0.70303
1.02906	0.692204
1.02988	0.681632
1.02907	0.671196
1.02708	0.66076
1.02602	0.650116
1.02512	0.6384
1.02368	0.62761
1.0242	0.617204
1.02134	0.606348
1.02049	0.595684
1.01981	0.585168
1.01855	0.573802
1.01736	0.562212
1.01444	0.550796
1.01172	0.539494
1.00994	0.527826
1.00943	0.516132
1.00969	0.504838
1.00708	0.493618
1.00589	0.48281
1.00413	0.471784
1.00366	0.460214
1.00089	0.449162
0.999033	0.438206
0.994618	0.427622
0.993577	0.416212
0.992973	0.405046
0.990424	0.394416
0.989293	0.38346
0.98754	0.371992
0.984317	0.360414
0.981834	0.349508
0.981691	0.338796
0.979284	0.327946
0.976889	0.317192
0.974739	0.306404
0.973495	0.295692
0.970135	0.28486
0.968164	0.274076
0.967968	0.26332
0.966678	0.252618
0.960776	0.241684
0.957832	0.230946
0.955993	0.220206
0.955577	0.209524
0.954545	0.199014
0.950305	0.18844
0.946071	0.177056
0.94278	0.165848
0.935892	0.155194
0.932698	0.144396
0.926602	0.133634
0.922736	0.122996
0.919244	0.112278
0.915828	0.102012
0.910641	0.09107
0.906846	0.079996
0.902567	0.069632
0.894468	0.059716
0.888815	0.049056
0.882975	0.03864
0.876229	0.0282
0.863021	0.017322
0.855397	0.006152
0.846495	0
0	0
0	0
-3.4539	-0.056206
-3.09003	-0.05206
-2.6524	-0.047886
-2.21238	-0.043958
-1.74439	-0.040128
-1.24491	-0.036178
-0.839586	-0.03212
-0.56655	-0.028004
-0.217904	-0.024064
-0.0756492	-0.020136
-0.0671485	-0.016052
-0.0437065	-0.01202
-0.0339222	-0.008026
-0.016758	-0.004036
0	0
0.0097033	0.004006
0.018108	0.008022
0.0238512	0.01202
0.0422806	0.016042
0.0434842	0.020114
0.0396741	0.020114
0.0816401	0.020116
0.0854199	0.030626
0.0943981	0.041864
0.106929	0.0524
0.122553	0.064086
0.134659	0.075308
0.155248	0.08722
0.171936	0.099058
0.188905	0.110494
0.20463	0.121028
0.22168	0.132284
0.239646	0.143862
0.254917	0.15529
0.271603	0.168232
0.283789	0.17904
0.295661	0.19023
0.307976	0.200708
0.322718	0.211184
0.340147	0.222402
0.350593	0.233984
0.361624	0.245656
0.376305	0.257314
0.386776	0.26885
0.397094	0.279962
0.409103	0.290966
0.420628	0.302482
0.432616	0.314348
0.441687	0.325862
0.452662	0.337272
0.461916	0.349304
0.471624	0.361064
0.481007	0.372452
0.490625	0.384066
0.497036	0.395826
0.507362	0.406558
0.515656	0.417904
0.523186	0.429554
0.531717	0.441198
0.541476	0.453228
0.55176	0.464048
0.557986	0.47484
0.566395	0.486458
0.576048	0.49731
0.584962	0.50903
0.59165	0.520464
0.600451	0.532854
0.607265	0.545114
0.618299	0.557584
0.624637	0.568592
0.633642	0.58107
0.639013	0.592322
0.647424	0.603348
0.654773	0.614638
0.661417	0.625858
0.670604	0.637418
0.679577	0.64993
0.684074	0.662414
0.691322	0.674948
0.698663	0.687392
0.704318	0.699124
0.710982	0.71181
0.715981	0.722736
0.721637	0.73366
0.727928	0.745058
0.732132	0.756702
0.740388	0.768378
0.747007	0.78123
0.754184	0.792484
0.759322	0.803478
0.764143	0.814658
0.772232	0.827258
0.780795	0.84055
0.787439	0.854072
0.792351	0.866282
0.797612	0.878288
0.804003	0.890246
0.810674	0.901252
0.819009	0.914088
0.821123	0.92541
0.825407	0.936458
0.832856	0.947866
0.837624	0.960058
0.844165	0.972456
0.850174	0.98567
0.855733	0.996602
0.861903	1
1.03945	1
1.03917	0.989664
1.03653	0.979796
1.03668	0.969566
1.03501	0.959356
1.03377	0.949212
1.03634	0.938698
1.03445	0.927958
1.03397	0.916932
1.03348	0.906278
1.02972	0.895874
1.02969	0.88455
1.02903	0.87325
1.0298	0.862364
1.02707	0.85217
1.02591	0.841248
1.02617	0.830208
1.02366	0.81967
1.02376	0.808866
1.02478	0.797894
1.02203	0.787888
1.02116	0.777512
1.01904	0.766632
1.01859	0.75536
1.01766	0.74419
1.01729	0.733148
1.01714	0.722164
1.01381	0.711062
1.01135	0.699712
1.01142	0.688308
1.01106	0.677102
1.00966	0.66717
1.00798	0.656192
1.0058	0.645242
1.00475	0.63415
1.00367	0.623168
1.00375	0.612302
1.00304	0.6013
1.00252	0.590756
1.0005	0.580812
0.99894	0.570566
0.99609	0.559658
0.995313	0.548886
0.994289	0.537998
0.992882	0.527178
0.990523	0.516338
0.991268	0.505426
0.989166	0.494394
0.990372	0.483562
0.987835	0.473078
0.98658	0.462562
0.984709	0.452322
0.981489	0.44205
0.981642	0.430964
0.979533	0.420166
0.978654	0.409314
0.974577	0.398476
0.973827	0.387462
0.972962	0.376424
0.969652	0.365352
0.969185	0.35454
0.966514	0.343564
0.964507	0.332322
0.961453	0.320678
0.96054	0.309176
0.957846	0.297698
0.954075	0.286404
0.95134	0.274992
0.950265	0.263536
0.947139	0.252248
0.944795	0.240862
0.941866	0.229352
0.938855	0.217674
0.936126	0.206758
0.933787	0.196222
0.931891	0.185716
0.927656	0.175106
0.921983	0.164428
0.917811	0.15336
0.914845	0.142742
0.910565	0.13216
0.905699	0.121358
0.902214	0.110714
0.89628	0.10016
0.892838	0.08951
0.885991	0.078732
0.879532	0.067162
0.871486	0.055876
0.863325	0.04515
0.856111	0.034428
0.850582	0.023952
0.841049	0.013126
0.830314	0.001978
0.819975	0
0	0
0	0
-3.50071	-0.05593
-2.97243	-0.051964
-2.49442	-0.047788
-2.06347	-0.043856
-1.7462	-0.03973
-1.38606	-0.035736
-0.992676	-0.031712
-0.623772	-0.027718
-0.325644	-0.023784
-0.0703877	-0.019744
-0.0574845	-0.015704
-0.038451	-0.01183
-0.0224715	-0.007848
-0.013279	-0.003878
0	0
0.0130484	0.003946
0.0206506	0.008016
0.0351653	0.012126
0.0499971	0.016242
0.0577578	0.020304
0.0606342	0.020304
0.0870489	0.020306
0.0945828	0.030722
0.0987882	0.041818
0.112142	0.052472
0.124605	0.06402
0.135217	0.075818
0.14523	0.087004
0.164843	0.099186
0.17601	0.11004
0.196973	0.121878
0.217608	0.134118
0.234527	0.146334
0.249618	0.158046
0.269404	0.170724
0.283543	0.181318
0.296909	0.19354
0.310969	0.204148
0.322744	0.214612
0.331683	0.224902
0.344617	0.235844
0.356622	0.247106
0.368398	0.258928
0.380686	0.270514
0.391603	0.282034
0.403466	0.293196
0.416814	0.304952
0.426114	0.316904
0.437082	0.328034
0.445798	0.33933
0.456221	0.350328
0.461999	0.36173
0.473543	0.372886
0.487664	0.386254
0.494671	0.397952
0.502865	0.409616
0.512915	0.42128
0.522584	0.433024
0.530468	0.444862
0.539561	0.456476
0.547036	0.467272
0.554913	0.47902
0.564507	0.491566
0.57251	0.50384
0.580022	0.515566
0.586415	0.526972
0.593531	0.538436
0.600589	0.549446
0.607966	0.561386
0.613661	0.57179
0.620244	0.58219
0.629214	0.592454
0.634472	0.604298
0.641181	0.616634
0.648862	0.629128
0.657105	0.641674
0.663405	0.653532
0.668766	0.66523
0.677439	0.676686
0.683403	0.688726
0.691252	0.700188
0.695108	0.711866
0.70681	0.723494
0.71391	0.734698
0.718903	0.746526
0.725932	0.758888
0.73251	0.770614
0.73846	0.783042
0.742069	0.79382
0.748955	0.804996
0.752076	0.816034
0.757995	0.828444
0.765556	0.83977
0.768845	0.851822
0.775547	0.86434
0.780797	0.876816
0.784683	0.888764
0.792425	0.89985
0.796984	0.912516
0.803778	0.924836
0.809775	0.93563
0.816467	0.947158
0.821342	0.959038
0.828814	0.971018
0.832842	0.984088
0.837223	0.99513
0.841353	1
0.779691	1
0.778265	0.989684
0.779489	0.97965
0.777263	0.96949
0.774372	0.959304
0.775125	0.948664
0.773944	0.93765
0.771965	0.92668
0.771133	0.916162
0.771035	0.905944
0.770889	0.894354
0.769605	0.88288
0.769346	0.87126
0.767598	0.859664
0.76786	0.84791
0.765899	0.836472
0.764462	0.824864
0.765447	0.812968
0.763068	0.803136
0.762763	0.793218
0.75919	0.782782
0.761146	0.77118
0.75895	0.759648
0.754871	0.748258
0.755402	0.736894
0.754823	0.725474
0.75482	0.714052
0.75135	0.703036
0.751367	0.692264
0.750158	0.681464
0.748287	0.670606
0.747272	0.659876
0.747783	0.64905
0.745251	0.638462
0.744186	0.627664
0.743872	0.616926
0.740765	0.60605
0.739665	0.595382
0.738842	0.584654
0.738671	0.574046
0.735509	0.56329
0.734336	0.552402
0.735194	0.5417
0.732322	0.530662
0.730099	0.51997
0.729966	0.509252
0.727769	0.49865
0.725059	0.487656
0.725536	0.477132
0.723332	0.466676
0.721183	0.455254
0.718137	0.444066
0.717566	0.43311
0.713793	0.4222
0.712558	0.411466
0.711739	0.400678
0.712904	0.390154
0.710156	0.379968
0.708215	0.369268
0.706487	0.358362
0.70436	0.347352
0.703722	0.336252
0.701788	0.325426
0.700465	0.314658
0.696006	0.303872
0.696212	0.293068
0.693844	0.28225
0.690659	0.27131
0.689947	0.260498
0.684991	0.249508
0.681807	0.238708
0.679915	0.227642
0.674914	0.216582
0.671855	0.206372
0.668438	0.19595
0.666206	0.18546
0.66109	0.173944
0.659421	0.162566
0.655272	0.150976
0.651171	0.139662
0.647046	0.128138
0.643934	0.11663
0.638506	0.105014
0.633371	0.093456
0.628761	0.082004
0.62551	0.070304
0.620228	0.05925
0.612895	0.048486
0.608449	0.037716
0.600242	0.02698
0.589603	0.016294
0.579624	0.00548
0.573094	0
0	0
0	0
-3.35731	-0.056344
-2.94473	-0.052146
-2.56569	-0.04797
-2.29322	-0.043832
-1.86449	-0.039836
-1.39785	-0.035848
-1.0084	-0.03198
-0.529791	-0.027858
-0.184881	-0.023646
-0.0859274	-0.01974
-0.046144	-0.01563
-0.0342867	-0.011758
-0.0222679	-0.007806
-0.0185755	-0.003924
0	0
0.01776	0.004122
0.0304468	0.008176
0.0392573	0.012006
0.0485211	0.01616
0.0654613	0.020278
0.0632648	0.020278
0.0833612	0.020278
0.0906812	0.030662
0.0983272	0.041698
0.110291	0.052396
0.12333	0.064386
0.13983	0.076152
0.152544	0.088418
0.169119	0.100692
0.18178	0.111932
0.197521	0.122642
0.210314	0.133918
0.230037	0.145544
0.245473	0.157274
0.262006	0.170598
0.275006	0.181948
0.288728	0.193204
0.299389	0.204408
0.311073	0.215178
0.323637	0.226242
0.337818	0.238072
0.350183	0.249502
0.364486	0.260384
0.37739	0.27215
0.390702	0.28376
0.39996	0.295476
0.40931	0.307324
0.418326	0.317952
0.427132	0.3297
0.437413	0.341636
0.445914	0.353332
0.459385	0.36473
0.46999	0.375926
0.480006	0.387584
0.487324	0.399256
0.498731	0.4108
0.506592	0.423556
0.514232	0.436174
0.526317	0.448288
0.53519	0.459764
0.544715	0.470914
0.551396	0.482578
0.559336	0.494332
0.568369	0.506144
0.57373	0.517688
0.58005	0.529196
0.588953	0.54096
0.596964	0.552682
0.603483	0.564366
0.610827	0.57615
0.618266	0.58772
0.62345	0.599398
0.630956	0.610936
0.63952	0.622716
0.646734	0.634362
0.653699	0.646176
0.661285	0.657332
0.668223	0.669522
0.674255	0.680392
0.682367	0.691644
0.688171	0.70343
0.695266	0.715968
0.702403	0.72763
0.709628	0.740282
0.716251	0.75342
0.723305	0.764196
0.732567	0.776202
0.737068	0.787472
0.742605	0.798728
0.747455	0.810168
0.753418	0.821066
0.759583	0.83237
0.762674	0.84364
0.770441	0.855306
0.774356	0.866266
0.782407	0.877604
0.785812	0.88861
0.791879	0.90028
0.798046	0.911614
0.803865	0.923468
0.808103	0.93447
0.813981	0.945474
0.820472	0.95646
0.824926	0.9675
0.829437	0.978736
0.834717	0.99097
0.840088	1
0.783423	1
0.781689	0.988752
0.779882	0.978524
0.778114	0.968124
0.778904	0.957294
0.778394	0.945976
0.777467	0.93492
0.777964	0.924282
0.778142	0.913598
0.776036	0.902774
0.774827	0.89211
0.772672	0.881288
0.771352	0.870528
0.769871	0.859978
0.769689	0.849374
0.768286	0.8386
0.770063	0.827598
0.767075	0.816896
0.766227	0.806726
0.76397	0.796904
0.76443	0.786542
0.761979	0.774928
0.761137	0.76398
0.760826	0.75252
0.760206	0.74092
0.759653	0.729528
0.758774	0.718676
0.755188	0.70791
0.753994	0.696744
0.752154	0.68656
0.751408	0.676726
0.751414	0.666174
0.750654	0.655142
0.749033	0.644094
0.746443	0.633198
0.745994	0.62233
0.743202	0.611326
0.743879	0.600346
0.741644	0.589804
0.740472	0.579402
0.738647	0.569286
0.735162	0.558886
0.735505	0.548318
0.735561	0.537698
0.733619	0.527328
0.732964	0.516868
0.731282	0.50632
0.73077	0.49564
0.727359	0.485128
0.726652	0.474706
0.725638	0.463952
0.721259	0.453664
0.719655	0.442322
0.719078	0.43056
0.718787	0.419854
0.716085	0.408914
0.714233	0.397204
0.712568	0.386026
0.712129	0.375168
0.709705	0.364296
0.70609	0.35342
0.705538	0.342708
0.703928	0.331894
0.701211	0.321202
0.69984	0.31032
0.697802	0.2994
0.696709	0.288926
0.695904	0.278736
0.691046	0.268094
0.685379	0.257318
0.683575	0.246704
0.681205	0.236324
0.677171	0.22525
0.677569	0.214122
0.672873	0.203226
0.669711	0.19233
0.665656	0.18146
0.663048	0.17063
0.658251	0.159786
0.653484	0.148736
0.648169	0.13784
0.642343	0.126758
0.63854	0.115864
0.634276	0.10507
0.630356	0.093944
0.626941	0.083134
0.62278	0.07213
0.616483	0.061336
0.609828	0.050314
0.602818	0.03934
0.595332	0.028322
0.584314	0.017132
0.573524	0.006306
0.563758	0
0	0
0	0
-3.55699	-0.055526
-3.1795	-0.05175
-2.85638	-0.047628
-2.56348	-0.043716
-2.13892	-0.03974
-1.64492	-0.03567
-1.10811	-0.031744
-0.754332	-0.02778
-0.414998	-0.02371
-0.0646065	-0.019684
-0.047232	-0.015726
-0.0418175	-0.01179
-0.0262124	-0.007856
-0.0127199	-0.00387
0	0
0.0126847	0.004018
0.0271119	0.00793
0.0341709	0.011676
0.0510014	0.015702
0.0526345	0.01978
0.0750097	0.02
0.0868896	0.02
0.0942852	0.030348
0.103099	0.041438
0.113392	0.052034
0.128524	0.064584
0.143278	0.075834
0.159586	0.08694
0.178673	0.097644
0.196601	0.110098
0.209304	0.121434
0.230695	0.133626
0.248487	0.1462
0.261901	0.15846
0.274251	0.171136
0.285056	0.182526
0.300675	0.194018
0.31491	0.205512
0.329971	0.215756
0.343489	0.226408
0.356996	0.237764
0.369643	0.250464
0.382024	0.26368
0.393974	0.27673
0.403818	0.287748
0.41526	0.299182
0.428348	0.310918
0.437205	0.32274
0.447374	0.334168
0.459346	0.345618
0.470683	0.357152
0.476451	0.369226
0.48434	0.380918
0.495759	0.39218
0.502508	0.403398
0.510796	0.41516
0.524457	0.428134
0.531643	0.440924
0.540774	0.45215
0.550025	0.464364
0.555796	0.475736
0.564305	0.487318
0.572352	0.499024
0.583872	0.511308
0.589713	0.523132
0.596927	0.53497
0.605668	0.54803
0.616176	0.560652
0.625657	0.571792
0.631242	0.583006
0.638697	0.59531
0.646519	0.606734
0.652276	0.618028
0.660121	0.62914
0.665425	0.640546
0.672271	0.651892
0.680128	0.663524
0.686101	0.675848
0.694033	0.687372
0.698928	0.698522
0.705422	0.709488
0.711708	0.72111
0.720973	0.732912
0.728204	0.744202
0.734469	0.755196
0.738589	0.766088
0.746176	0.779556
0.750545	0.790764
0.75649	0.801236
0.761013	0.812104
0.769403	0.824088
0.774443	0.836336
0.780882	0.848732
0.785839	0.86107
0.789593	0.872336
0.799103	0.88374
0.802938	0.89532
0.808526	0.906908
0.815821	0.918518
0.822268	0.930272
0.8248	0.94187
0.831142	0.95296
0.836929	0.965546
0.844281	0.977438
0.851158	0.989716
0.856571	1
0.845428	0.999998
0.843721	0.989368
0.843564	0.97918
0.842329	0.969348
0.842333	0.959152
0.841805	0.949102
0.840295	0.937262
0.840923	0.926506
0.838897	0.91507
0.837733	0.903878
0.836852	0.89312
0.836505	0.882534
0.836835	0.871802
0.836017	0.86092
0.834262	0.85001
0.83337	0.839266
0.830753	0.828698
0.830781	0.81814
0.831894	0.807262
0.83038	0.79736
0.825109	0.787232
0.824085	0.776418
0.826905	0.764908
0.824826	0.754012
0.824176	0.744126
0.822816	0.73333
0.822017	0.72192
0.818601	0.710664
0.817925	0.699932
0.815386	0.68912
0.814315	0.678568
0.814522	0.667838
0.814824	0.656242
0.810851	0.645042
0.809537	0.634664
0.808267	0.624322
0.807342	0.613924
0.806681	0.603564
0.807304	0.593184
0.806127	0.582928
0.802639	0.57213
0.802342	0.56138
0.800792	0.55028
0.798967	0.539452
0.797584	0.528458
0.79752	0.517918
0.795855	0.507714
0.792218	0.496962
0.791475	0.486002
0.790727	0.475122
0.787687	0.464162
0.788364	0.453324
0.78686	0.442402
0.783545	0.431712
0.782159	0.420914
0.780413	0.410174
0.77886	0.39971
0.77756	0.389924
0.775243	0.379414
0.771324	0.368046
0.77068	0.356488
0.768648	0.34557
0.766289	0.335148
0.763722	0.324572
0.762188	0.31338
0.761195	0.302426
0.757898	0.29122
0.756522	0.280244
0.755476	0.269142
0.749758	0.258168
0.746009	0.246848
0.744955	0.235664
0.742349	0.224766
0.736212	0.213528
0.732757	0.202346
0.727906	0.191432
0.726872	0.180408
0.722518	0.169518
0.720187	0.158418
0.716373	0.147322
0.712533	0.13631
0.707354	0.124908
0.702666	0.11377
0.698462	0.10285
0.693146	0.09172
0.689868	0.080712
0.685528	0.069722
0.678685	0.058708
0.67063	0.04774
0.66393	0.036524
0.65527	0.025296
0.647137	0.014478
0.63841	0.004242
0.629022	0
0	0
0	0
-3.33741	-0.055744
-2.97857	-0.051844
-2.61048	-0.047814
-2.2614	-0.043734
-1.89355	-0.039784
-1.50666	-0.035876
-1.07677	-0.031832
-0.598563	-0.02772
-0.0704451	-0.023698
-0.0625391	-0.019572
-0.0486156	-0.015648
-0.0357725	-0.011886
-0.0199461	-0.007922
-0.0100342	-0.003978
0	0
0.00824676	0.003982
0.0186974	0.007982
0.0336037	0.011952
0.0415574	0.015952
0.0476277	0.0199
0.0651209	0.02
0.0823413	0.02
0.0887148	0.030518
0.102456	0.044276
0.113122	0.054936
0.123182	0.06864
0.137435	0.07943
0.156729	0.09125
0.173129	0.102924
0.191621	0.114358
0.206508	0.125724
0.226894	0.137234
0.244686	0.1485
0.257418	0.159612
0.271983	0.171804
0.285251	0.182868
0.299439	0.194208
0.308295	0.205384
0.32313	0.215884
0.332695	0.226714
0.342403	0.23782
0.357018	0.25019
0.369755	0.263194
0.384492	0.274898
0.393581	0.286534
0.406165	0.298032
0.414908	0.309224
0.428124	0.321352
0.439795	0.333442
0.450893	0.344882
0.460123	0.356598
0.472412	0.368288
0.479433	0.378868
0.492849	0.390584
0.498119	0.402192
0.505083	0.413848
0.517895	0.425522
0.525775	0.4368
0.532121	0.448608
0.54232	0.460898
0.548826	0.472504
0.557824	0.483916
0.569001	0.49609
0.576531	0.50801
0.583741	0.519816
0.595358	0.53131
0.600744	0.54215
0.608936	0.554754
0.615157	0.566034
0.625121	0.577172
0.631274	0.58944
0.638913	0.6004
0.643757	0.611434
0.652729	0.623508
0.658882	0.634092
0.664078	0.645032
0.670806	0.655822
0.677995	0.667236
0.684299	0.678932
0.689658	0.690416
0.700897	0.702696
0.706347	0.713822
0.713328	0.72481
0.718106	0.73593
0.723443	0.747062
0.727228	0.758492
0.734259	0.77021
0.740797	0.783026
0.746649	0.793582
0.752902	0.804596
0.75814	0.81619
0.763695	0.827844
0.772096	0.839282
0.776566	0.850568
0.781437	0.862322
0.788897	0.87413
0.794705	0.885806
0.799374	0.897166
0.805214	0.90892
0.811318	0.9218
0.817907	0.932412
0.822862	0.942852
0.829053	0.955152
0.834132	0.966382
0.841461	0.977792
0.849309	0.991164
0.852778	1
0.94281	1
0.941122	0.989602
0.940433	0.979586
0.939066	0.969582
0.938654	0.95935
0.937305	0.949568
0.936164	0.937788
0.937162	0.926904
0.935007	0.915934
0.934645	0.904972
0.933626	0.893982
0.930828	0.883084
0.931264	0.873184
0.928701	0.86249
0.92851	0.85072
0.927526	0.839488
0.926123	0.828976
0.925029	0.818376
0.926835	0.807978
0.922658	0.79804
0.920678	0.787236
0.921846	0.776104
0.920949	0.765232
0.919534	0.754522
0.91781	0.74361
0.919149	0.732536
0.91865	0.721248
0.916139	0.710238
0.916127	0.69985
0.913783	0.689486
0.911216	0.678302
0.91148	0.667262
0.91065	0.656168
0.909906	0.645206
0.909784	0.634272
0.907172	0.623232
0.90436	0.612278
0.904297	0.601258
0.901549	0.590766
0.900021	0.580224
0.899211	0.569212
0.898001	0.558264
0.895088	0.547414
0.893858	0.536418
0.891617	0.525686
0.891659	0.514812
0.892009	0.5039
0.889446	0.493172
0.888543	0.482598
0.886928	0.471672
0.884817	0.46001
0.882617	0.448556
0.881374	0.436974
0.879021	0.425662
0.878392	0.414132
0.873471	0.403022
0.874243	0.39226
0.872068	0.381674
0.870638	0.370946
0.867587	0.36024
0.866789	0.349478
0.864137	0.338766
0.860051	0.328058
0.859162	0.3173
0.856596	0.306648
0.854791	0.29605
0.853052	0.285422
0.849695	0.273864
0.844648	0.262546
0.843286	0.251048
0.841365	0.239668
0.838866	0.228098
0.835283	0.216982
0.833425	0.206266
0.828638	0.195478
0.824873	0.184706
0.822821	0.173886
0.818987	0.163152
0.814257	0.152268
0.810999	0.141334
0.805663	0.130454
0.801222	0.11966
0.797163	0.108976
0.792773	0.098162
0.788271	0.087476
0.78252	0.077044
0.773238	0.06626
0.766401	0.054768
0.759824	0.043254
0.751652	0.031664
0.742421	0.020298
0.732594	0.008664
0.722537	0
0	0
0	0
-3.44717	-0.056666
-3.02959	-0.05253
-2.64487	-0.04863
-2.17346	-0.044636
-1.72185	-0.040676
-1.35181	-0.03669
-0.988975	-0.03278
-0.547997	-0.028606
-0.0952087	-0.02434
-0.0654276	-0.020234
-0.0561343	-0.016378
-0.0302496	-0.012318
-0.0298428	-0.008246
-0.0133176	-0.004142
0	0
0.0169143	0.00411
0.0234518	0.00819
0.0353759	0.012284
0.0436245	0.016216
0.0514282	0.020148
0.0520054	0.020148
0.0837723	0.02015
0.0886665	0.031086
0.0983669	0.042304
0.109816	0.05307
0.125089	0.066416
0.135482	0.077784
0.151221	0.089116
0.166141	0.099988
0.187121	0.111406
0.203762	0.123216
0.223329	0.133842
0.240472	0.1453
0.259437	0.15644
0.271994	0.169412
0.285215	0.180406
0.296799	0.19178
0.308455	0.203518
0.319915	0.213898
0.33098	0.22448
0.341645	0.235454
0.354817	0.24645
0.369299	0.258088
0.378214	0.269916
0.387491	0.280912
0.399275	0.293218
0.409807	0.306544
0.42421	0.317188
0.434327	0.32793
0.443237	0.33925
0.455704	0.350956
0.466368	0.362496
0.474873	0.37407
0.484179	0.385736
0.494922	0.397456
0.503873	0.409054
0.514333	0.420718
0.521352	0.432004
0.532603	0.444902
0.54011	0.457286
0.549256	0.468244
0.55416	0.478692
0.563792	0.49072
0.572743	0.5025
0.580792	0.51389
0.586713	0.525672
0.594836	0.538378
0.605305	0.551866
0.611793	0.562708
0.620998	0.574254
0.628406	0.585498
0.638849	0.59732
0.642433	0.609494
0.653969	0.62184
0.664298	0.635578
0.669595	0.6465
0.676388	0.657402
0.680417	0.668706
0.690151	0.680892
0.696222	0.692282
0.704406	0.703604
0.709301	0.71572
0.714983	0.726898
0.721845	0.738156
0.726784	0.749784
0.736149	0.76106
0.74166	0.772402
0.74716	0.785344
0.753114	0.796948
0.758499	0.808476
0.764161	0.820582
0.771469	0.833092
0.776778	0.844716
0.782719	0.855722
0.7884	0.867514
0.793858	0.878698
0.80222	0.889926
0.807309	0.901756
0.81218	0.913142
0.817668	0.923498
0.825775	0.935404
0.829864	0.946708
0.834993	0.95912
0.839673	0.972204
0.845018	0.983728
0.849599	0.995194
0.854615	1
0.977859	1
0.978145	0.989694
0.975414	0.979334
0.976144	0.96921
0.973081	0.95863
0.97034	0.947202
0.971096	0.935694
0.970239	0.92427
0.971317	0.912964
0.970458	0.901972
0.967735	0.891264
0.966587	0.880624
0.966306	0.869846
0.964615	0.859052
0.964067	0.848274
0.96378	0.837494
0.963531	0.826886
0.961626	0.816128
0.961936	0.805044
0.961033	0.79515
0.960214	0.784412
0.95745	0.772898
0.956101	0.761524
0.953152	0.750048
0.953318	0.738892
0.952648	0.728374
0.952135	0.716668
0.95099	0.705548
0.948938	0.694832
0.948843	0.684056
0.9483	0.673338
0.946839	0.662908
0.945402	0.652644
0.942431	0.642134
0.942908	0.631486
0.939623	0.621016
0.939874	0.610452
0.939816	0.599892
0.937111	0.58907
0.936889	0.578054
0.934525	0.567486
0.933224	0.556308
0.932481	0.545508
0.931362	0.53481
0.929687	0.524212
0.929621	0.513388
0.929099	0.502676
0.926912	0.492172
0.923073	0.481612
0.922527	0.46996
0.92207	0.458892
0.922263	0.449104
0.918612	0.438286
0.917675	0.426768
0.914803	0.415692
0.913655	0.405288
0.909324	0.394066
0.908628	0.38272
0.905945	0.371142
0.902856	0.359704
0.901937	0.348294
0.900201	0.337078
0.897928	0.325702
0.89556	0.314294
0.894387	0.30292
0.89197	0.29204
0.889261	0.28207
0.885042	0.27179
0.885193	0.261254
0.883137	0.250506
[truncated: 18,272 more rows]

## Sheet: DNA + Trehalose
Normalized Depth (nm)	Normalized Load (mN)
-3.35473	-0.056334
-3.0384	-0.052348
-2.61909	-0.048414
-2.20052	-0.044346
-1.85293	-0.040274
-1.55297	-0.036258
-1.31008	-0.03229
-0.850602	-0.028384
-0.35797	-0.024258
-0.0393232	-0.020152
-0.0396607	-0.015938
-0.0213115	-0.012024
-0.0147565	-0.00813
-0.00654764	-0.004018
0	0
0.0126921	0.003888
0.0216137	0.00808
0.0379444	0.01221
0.0492568	0.016334
0.0568193	0.020444
0.0541209	0.020444
0.0974138	0.020446
0.102897	0.031592
0.112024	0.044452
0.118493	0.054996
0.126842	0.066672
0.137479	0.078364
0.149668	0.090696
0.167468	0.102916
0.184994	0.114022
0.211679	0.125784
0.228345	0.137606
0.244755	0.148782
0.262557	0.161576
0.272939	0.173292
0.285676	0.18426
0.302174	0.19597
0.315073	0.207262
0.329068	0.217814
0.341874	0.228944
0.354297	0.239758
0.370288	0.25083
0.387091	0.26267
0.399654	0.27413
0.412321	0.286104
0.424137	0.298418
0.434816	0.310386
0.44674	0.321812
0.457175	0.333586
0.469011	0.34556
0.479803	0.356416
0.490797	0.367596
0.501268	0.37827
0.508172	0.389404
0.517606	0.400728
0.530278	0.412344
0.541869	0.423764
0.55067	0.435746
0.562362	0.448224
0.569855	0.459256
0.580034	0.470802
0.588965	0.481888
0.599859	0.493152
0.610185	0.504436
0.617762	0.515332
0.630107	0.527324
0.638223	0.539596
0.647524	0.551346
0.65613	0.562482
0.663081	0.573384
0.669772	0.584584
0.680873	0.59538
0.694413	0.608
0.703196	0.621336
0.713015	0.634734
0.720398	0.64578
0.728236	0.65706
0.73713	0.67003
0.746942	0.681034
0.753886	0.692486
0.7609	0.702978
0.770929	0.714838
0.776976	0.726634
0.785073	0.737378
0.794222	0.749478
0.802142	0.761482
0.810986	0.772596
0.816652	0.78666
0.826404	0.797382
0.832352	0.808454
0.840814	0.820178
0.848853	0.832624
0.854682	0.843554
0.864904	0.854376
0.870981	0.865416
0.876036	0.876298
0.883282	0.887306
0.885864	0.898392
0.890703	0.909904
0.897547	0.920894
0.904759	0.933502
0.910384	0.945278
0.916302	0.958036
0.926424	0.97058
0.931872	0.982568
0.938254	0.993598
0.944026	1
0.928534	1
0.930086	0.990246
0.927409	0.98029
0.925261	0.970308
0.925581	0.96022
0.925411	0.94958
0.923586	0.938188
0.922037	0.92668
0.92181	0.915332
0.919876	0.904298
0.918725	0.893232
0.917663	0.882318
0.916002	0.871624
0.914814	0.860924
0.915396	0.849976
0.914341	0.839192
0.91174	0.82827
0.912489	0.81748
0.911177	0.80708
0.908916	0.797084
0.907505	0.786756
0.905135	0.776346
0.902931	0.765374
0.904297	0.755388
0.902262	0.744446
0.900548	0.733436
0.901009	0.722278
0.899725	0.711462
0.897505	0.700464
0.897947	0.689904
0.897658	0.679002
0.894975	0.66762
0.893222	0.656228
0.892356	0.645134
0.892109	0.634408
0.888751	0.623778
0.888624	0.613098
0.886071	0.60249
0.886312	0.591794
0.885015	0.580684
0.883631	0.569902
0.882819	0.559294
0.879697	0.549072
0.879194	0.538232
0.878759	0.52748
0.877164	0.517034
0.875497	0.505662
0.873776	0.494268
0.8725	0.483228
0.870787	0.472486
0.871855	0.461916
0.870587	0.451174
0.868383	0.440502
0.866494	0.429736
0.865771	0.418874
0.861439	0.408156
0.860681	0.397536
0.857224	0.386956
0.856684	0.376144
0.857875	0.36545
0.855328	0.354694
0.852339	0.344116
0.852718	0.333302
0.849251	0.322482
0.848564	0.311682
0.846054	0.300994
0.844463	0.290274
0.842474	0.279692
0.840709	0.268896
0.837931	0.258168
0.836779	0.247382
0.835504	0.23654
0.831793	0.2259
0.830988	0.215128
0.828414	0.204424
0.82607	0.193606
0.825231	0.18278
0.823364	0.17206
0.82001	0.161288
0.818789	0.150456
0.816503	0.13977
0.812465	0.128834
0.812467	0.118014
0.808439	0.107272
0.80235	0.096284
0.800699	0.084686
0.795083	0.073258
0.79415	0.061654
0.790596	0.05017
0.788481	0.03894
0.779791	0.028026
0.770069	0.01729
0.757349	0.006496
0.75202	0
0	0
0	0
-3.69464	-0.057888
-3.24745	-0.053968
-2.75525	-0.049834
-2.33471	-0.045568
-1.88159	-0.041482
-1.48766	-0.03723
-1.10262	-0.03297
-0.68925	-0.028978
-0.112364	-0.024842
-0.0565858	-0.02073
-0.0328211	-0.01649
-0.0328091	-0.012324
-0.0167195	-0.008232
-0.00206984	-0.004094
0	0
0.00966136	0.003906
0.0183684	0.00772
0.0325387	0.01154
0.0414008	0.015498
0.0566	0.01946
0.0814658	0.02
0.0870021	0.02
0.0928825	0.032398
0.102062	0.044252
0.114169	0.057084
0.121215	0.068408
0.139057	0.078988
0.165658	0.090624
0.184389	0.101986
0.198745	0.113022
0.21536	0.124802
0.233234	0.137142
0.250007	0.149408
0.267342	0.162808
0.278515	0.173354
0.289667	0.184274
0.304353	0.19588
0.319167	0.207846
0.334228	0.218366
0.347035	0.229316
0.362138	0.241268
0.371641	0.253352
0.386319	0.264242
0.399051	0.275478
0.410406	0.288014
0.420175	0.29951
0.429902	0.310886
0.445149	0.32256
0.456807	0.335008
0.466239	0.34672
0.477375	0.357768
0.487483	0.369214
0.49825	0.380388
0.5095	0.39197
0.521606	0.404316
0.530583	0.41742
0.542106	0.428622
0.551382	0.44006
0.561192	0.451822
0.572475	0.46376
0.582717	0.474618
0.594212	0.486862
0.602698	0.499142
0.609151	0.51082
0.618188	0.522164
0.625797	0.533648
0.632613	0.544612
0.642375	0.557004
0.651285	0.57043
0.659488	0.582624
0.66768	0.594216
0.678712	0.60682
0.6876	0.617592
0.696546	0.629214
0.703941	0.64041
0.713184	0.651412
0.722555	0.662702
0.73041	0.673864
0.740426	0.685214
0.748312	0.696486
0.756999	0.707702
0.765191	0.719394
0.773296	0.7308
0.781318	0.742612
0.784919	0.753636
0.795241	0.765366
0.802019	0.777524
0.807949	0.789552
0.814754	0.800216
0.824218	0.812874
0.832398	0.825494
0.8375	0.837604
0.844938	0.848822
0.850708	0.859752
0.856389	0.87101
0.864383	0.881784
0.873349	0.894298
0.879214	0.905306
0.883314	0.917012
0.892915	0.92941
0.898276	0.941018
0.904717	0.952288
0.911371	0.96339
0.92197	0.975266
0.928204	0.98787
0.934684	0.999402
0.938694	1
0.984366	1
0.981889	0.98956
0.981656	0.979554
0.980371	0.969364
0.977519	0.958892
0.977995	0.948176
0.977256	0.937396
0.975514	0.926602
0.973715	0.915514
0.972406	0.904608
0.973034	0.89378
0.972249	0.882738
0.970865	0.871576
0.968828	0.860698
0.966508	0.849764
0.966522	0.838972
0.967111	0.827754
0.966381	0.816534
0.962938	0.805962
0.960387	0.795868
0.959791	0.785504
0.959958	0.774296
0.958193	0.763176
0.95617	0.753294
0.955995	0.743374
0.955039	0.733032
0.954517	0.722058
0.953333	0.711022
0.951702	0.700688
0.952265	0.690274
0.950909	0.679754
0.947805	0.669288
0.946996	0.658148
0.944368	0.647106
0.944476	0.63613
0.941487	0.6254
0.938933	0.614998
0.938701	0.604696
0.936745	0.594306
0.938444	0.583756
0.934901	0.572696
0.937388	0.562242
0.932454	0.552072
0.933798	0.541268
0.930979	0.530092
0.928646	0.519252
0.928219	0.508364
0.927871	0.497064
0.925657	0.486158
0.924046	0.475064
0.92131	0.46426
0.921272	0.45344
0.919553	0.442716
0.91951	0.431082
0.917856	0.419862
0.915522	0.409114
0.913984	0.398222
0.912133	0.387424
0.910447	0.376404
0.908697	0.365554
0.907855	0.354874
0.907304	0.34416
0.904842	0.333368
0.902005	0.32285
0.901375	0.31195
0.901179	0.301226
0.899388	0.290558
0.897131	0.280002
0.895	0.269236
0.893177	0.258564
0.892508	0.24778
0.890732	0.237044
0.887378	0.226292
0.886305	0.21544
0.885192	0.20455
0.881949	0.193766
0.881792	0.183054
0.880515	0.172336
0.878227	0.161628
0.876065	0.150992
0.873192	0.140176
0.870318	0.129272
0.867445	0.11858
0.865258	0.10776
0.864141	0.097044
0.861989	0.086344
0.859535	0.07549
0.855867	0.06478
0.855976	0.054366
0.849357	0.043558
0.846061	0.032754
0.84157	0.022066
0.839281	0.011232
0.834639	0
0	0
0	0
-3.44126	-0.05618
-3.09755	-0.05207
-2.7662	-0.047922
-2.38567	-0.043714
-2.02888	-0.03976
-1.58214	-0.035844
-1.13023	-0.03179
-0.715726	-0.027656
-0.375738	-0.0237
-0.0450738	-0.019714
-0.0411593	-0.015724
-0.0344883	-0.01173
-0.0301102	-0.00776
-0.0165029	-0.004046
0	0
0.0119014	0.004156
0.0217281	0.008242
0.0339738	0.011938
0.0369329	0.0159
0.0475106	0.020006
0.0455858	0.020006
0.0789522	0.020006
0.0886746	0.031224
0.0965351	0.044806
0.110438	0.055178
0.126289	0.06694
0.144795	0.078438
0.164903	0.090204
0.185145	0.10122
0.20143	0.112354
0.21573	0.12356
0.233114	0.135106
0.245919	0.146668
0.259174	0.157652
0.277057	0.170944
0.294612	0.182148
0.309569	0.193662
0.322978	0.205008
0.332362	0.215328
0.342238	0.225856
0.356163	0.236938
0.368244	0.248022
0.381874	0.259962
0.391617	0.271562
0.404268	0.282518
0.414682	0.293766
0.424536	0.30504
0.436659	0.316392
0.449706	0.327474
0.462973	0.340076
0.474035	0.351588
0.484266	0.36222
0.497164	0.375034
0.507836	0.387756
0.514299	0.39853
0.523671	0.410368
0.534395	0.422788
0.543542	0.434328
0.553348	0.445308
0.565886	0.457666
0.573509	0.469308
0.585021	0.480974
0.594427	0.492376
0.604634	0.50401
0.614802	0.515826
0.625353	0.528406
0.632033	0.540934
0.640636	0.552798
0.652786	0.564416
0.659402	0.576602
0.66843	0.5878
0.67544	0.599486
0.682792	0.610396
0.691067	0.621666
0.699433	0.63329
0.708711	0.64421
0.716995	0.65658
0.724137	0.668042
0.733937	0.67917
0.742092	0.690056
0.74976	0.702538
0.759027	0.713606
0.767542	0.72439
0.776776	0.735538
0.784104	0.747446
0.792807	0.75906
0.802003	0.77078
0.806584	0.783382
0.817897	0.79421
0.825089	0.805694
0.831814	0.817332
0.838752	0.828894
0.847362	0.840186
0.855413	0.851948
0.863157	0.86367
0.870618	0.87536
0.878577	0.887168
0.887365	0.898874
0.891883	0.910678
0.900661	0.922404
0.905883	0.934008
0.91466	0.94547
0.919345	0.957462
0.927037	0.969718
0.936131	0.981706
0.943264	0.994194
0.94717	1
1.02225	1
1.02005	0.989622
1.02067	0.979716
1.02094	0.969638
1.01747	0.959346
1.01755	0.949104
1.01512	0.93838
1.01471	0.92704
1.01383	0.915472
1.01091	0.90418
1.00807	0.89327
1.01033	0.882488
1.00768	0.87182
1.00698	0.86098
1.00524	0.850308
1.00532	0.839626
1.00249	0.828738
1.00326	0.818042
0.999872	0.807284
0.997635	0.79731
0.996653	0.786968
0.997435	0.775382
0.995876	0.76385
0.994991	0.752254
0.995103	0.74112
0.991661	0.730506
0.990151	0.719434
0.990974	0.708684
0.988401	0.697898
0.987211	0.687082
0.985345	0.676178
0.984144	0.66583
0.98416	0.655108
0.98182	0.643696
0.98196	0.632238
0.979087	0.621308
0.977716	0.6105
0.976722	0.599354
0.97527	0.58822
0.972952	0.577038
0.973713	0.566102
0.97208	0.554912
0.969805	0.543978
0.967194	0.53267
0.965464	0.521326
0.966239	0.510124
0.963456	0.499302
0.962557	0.488226
0.961801	0.476822
0.959613	0.465516
0.959256	0.454122
0.956615	0.442514
0.955906	0.431066
0.953879	0.4195
0.951758	0.408512
0.950858	0.398224
0.948702	0.387882
0.94897	0.377294
0.946437	0.366852
0.943902	0.356178
0.941164	0.345218
0.940772	0.333992
0.938932	0.32311
0.936721	0.3122
0.935268	0.30125
0.934787	0.290376
0.932481	0.279636
0.930344	0.26892
0.926198	0.258516
0.927298	0.248104
0.925781	0.2371
0.921163	0.226202
0.920881	0.215306
0.91893	0.204456
0.917421	0.193378
0.913995	0.182408
0.91155	0.1715
0.909498	0.160454
0.909162	0.149326
0.904968	0.138504
0.902319	0.12731
0.901739	0.116468
0.899008	0.105656
0.894376	0.094876
0.890794	0.084234
0.889526	0.0739
0.88597	0.063524
0.882738	0.05259
0.879848	0.041698
0.878756	0.03082
0.872839	0.019942
0.865735	0.009114
0.863353	0
0	0
0	0
-3.51801	-0.060714
-3.00073	-0.05664
-2.58937	-0.052406
-2.19616	-0.048312
-1.84697	-0.044434
-1.45774	-0.040392
-1.14365	-0.03641
-0.769983	-0.03242
-0.423285	-0.028426
-0.0639122	-0.02444
-0.0536542	-0.020244
-0.0470324	-0.016282
-0.0430673	-0.012312
-0.0277672	-0.008268
-0.0180457	-0.0042
0	0
0.0126339	0.003878
0.0193451	0.007732
0.0260481	0.011564
0.0391952	0.015654
0.0832695	0.02
0.113617	0.02
0.120685	0.0307
0.127928	0.042388
0.133458	0.054568
0.139444	0.06561
0.148303	0.076644
0.159565	0.088058
0.174247	0.099804
0.195532	0.111486
0.216044	0.1231
0.236303	0.134594
0.253044	0.1461
0.269693	0.158376
0.278923	0.169054
0.291144	0.180076
0.303375	0.191512
0.312501	0.20297
0.323541	0.21349
0.337459	0.224394
0.34946	0.235604
0.362865	0.247606
0.37513	0.25985
0.38782	0.272128
0.399892	0.284582
0.41091	0.295486
0.424358	0.30657
0.437822	0.318058
0.448422	0.329722
0.460559	0.341576
0.473358	0.352794
0.48524	0.364394
0.495769	0.375952
0.506152	0.387484
0.515709	0.39903
0.527347	0.410594
0.540784	0.422286
0.547941	0.433492
0.558056	0.4446
0.569739	0.45682
0.582399	0.468392
0.590264	0.48003
0.59834	0.491636
0.606942	0.503082
0.615044	0.514864
0.627585	0.526376
0.637393	0.53775
0.646732	0.549372
0.654517	0.560726
0.662023	0.57169
0.671202	0.582446
0.680036	0.594852
0.687289	0.606396
0.694086	0.617538
0.699814	0.628204
0.711356	0.639946
0.717535	0.651778
0.724468	0.663304
0.734604	0.674982
0.743281	0.686542
0.74883	0.697974
0.757683	0.709164
0.768952	0.72103
0.774464	0.73208
0.781893	0.74329
0.791476	0.755204
0.801608	0.76787
0.809571	0.781306
0.821309	0.793874
0.828712	0.807168
0.83664	0.81818
0.847552	0.830694
0.85425	0.841494
0.86137	0.852576
0.869557	0.863964
0.87934	0.875518
0.890557	0.886586
0.89764	0.8977
0.905338	0.910008
0.913135	0.921134
0.918341	0.93306
0.923641	0.943502
0.93141	0.954228
0.93561	0.965436
0.945231	0.980048
0.951051	0.99192
0.957991	1
1.06017	1
1.05835	0.98963
1.05766	0.979638
1.05691	0.969728
1.05693	0.959652
1.057	0.948984
1.05551	0.938068
1.05473	0.927248
1.05366	0.91614
1.05375	0.90523
1.05205	0.894358
1.05043	0.883514
1.04982	0.872504
1.04901	0.861616
1.04825	0.850628
1.04655	0.839686
1.04376	0.828886
1.04357	0.817712
1.04404	0.80672
1.04127	0.796908
1.04144	0.786952
1.03984	0.77615
1.03754	0.765546
1.03792	0.75459
1.03605	0.743888
1.03637	0.733234
1.03402	0.72263
1.03446	0.712042
1.03274	0.701424
1.03182	0.690742
1.03197	0.680118
1.03141	0.669458
1.03087	0.65881
1.02745	0.648196
1.02429	0.637372
1.0235	0.626814
1.02028	0.616162
1.02221	0.605552
1.02032	0.59496
1.02046	0.584154
1.02012	0.573624
1.0158	0.563208
1.01526	0.55236
1.01553	0.542028
1.01348	0.531776
1.01088	0.521138
1.01156	0.509296
1.00852	0.497516
1.00615	0.486096
1.00682	0.475448
1.00319	0.464826
1.002	0.45414
1.0026	0.443392
1.00081	0.432618
0.998506	0.421846
0.997285	0.411126
0.995733	0.400348
0.996055	0.389576
0.994535	0.378434
0.993129	0.36765
0.990567	0.356896
0.989647	0.345924
0.988237	0.335112
0.98599	0.324256
0.9829	0.313164
0.981419	0.301784
0.981085	0.29042
0.977088	0.279208
0.97488	0.267668
0.975064	0.2563
0.972446	0.244956
0.970095	0.233504
0.967433	0.221806
0.965701	0.210418
0.96468	0.199328
0.962423	0.188478
0.961672	0.177608
0.958798	0.166908
0.95818	0.15589
0.954879	0.14533
0.95318	0.134414
0.949917	0.123624
0.952137	0.11282
0.946487	0.102038
0.941822	0.091324
0.939813	0.080452
0.935063	0.069614
0.932845	0.058876
0.92889	0.04817
0.926365	0.03746
0.924207	0.026654
0.91698	0.015818
0.915738	0.005008
0.909437	0
0	0
0	0
-3.73631	-0.056332
-3.39606	-0.052156
-3.04864	-0.04805
-2.6363	-0.04411
-2.10699	-0.04026
-1.56216	-0.036358
-1.17617	-0.032318
-0.754154	-0.028376
-0.368864	-0.024196
-0.0502179	-0.020028
-0.0524072	-0.015848
-0.0338383	-0.011684
-0.0251648	-0.007776
-0.0163892	-0.003952
0	0
0.010275	0.003886
0.0247348	0.007896
0.0385209	0.01204
0.0468391	0.016158
0.0565393	0.02031
0.0593129	0.02031
0.106033	0.02031
0.112515	0.030538
0.119199	0.041686
0.127967	0.052348
0.138922	0.063896
0.150787	0.075112
0.161618	0.08644
0.172996	0.097716
0.187073	0.10916
0.206624	0.120696
0.229869	0.132368
0.243948	0.143642
0.258489	0.15469
0.27765	0.168146
0.297007	0.178926
0.315823	0.190168
0.327029	0.201722
0.338546	0.212502
0.352021	0.223008
0.364549	0.234556
0.378753	0.246346
0.391077	0.257618
0.402751	0.269232
0.416108	0.281056
0.430785	0.293552
0.442213	0.305908
0.453484	0.317926
0.465286	0.32956
0.47898	0.340832
0.488295	0.352168
0.500667	0.363398
0.510256	0.374514
0.52324	0.38616
0.533864	0.39817
0.548044	0.40976
0.556868	0.421364
0.56735	0.433542
0.574382	0.445106
0.582976	0.45656
0.593766	0.469206
0.603359	0.481596
0.615516	0.493076
0.624938	0.504364
0.633629	0.516158
0.643053	0.528168
0.650105	0.54015
0.657236	0.551812
0.666877	0.563052
0.679189	0.574156
0.687214	0.585322
0.692942	0.596202
0.700984	0.607426
0.709751	0.61946
0.716191	0.631208
0.723619	0.642174
0.733961	0.653584
0.745346	0.665382
0.751732	0.677302
0.759741	0.688492
0.764983	0.699794
0.772823	0.711726
0.779695	0.724154
0.788938	0.73652
0.800995	0.748762
0.807446	0.759948
0.81645	0.770888
0.824873	0.78278
0.832429	0.793744
0.83741	0.8043
0.845233	0.81538
0.853861	0.826638
0.860946	0.838128
0.867879	0.849722
0.874408	0.861
0.881823	0.873228
0.891047	0.885668
0.897345	0.897108
0.904041	0.909332
0.915822	0.921254
0.922715	0.933178
0.932917	0.945418
0.937053	0.956892
0.943815	0.968168
0.950216	0.979836
0.958064	0.992778
0.964585	1
1.1414	0.999998
1.13841	0.988774
1.13928	0.978774
1.13867	0.96867
1.13789	0.958648
1.13458	0.948242
1.13453	0.937232
1.13298	0.926552
1.1306	0.915962
1.12942	0.90444
1.12991	0.892854
1.1274	0.881668
1.12836	0.870944
1.12689	0.85995
1.12423	0.849662
1.12334	0.83876
1.12183	0.827878
1.12254	0.817048
1.12339	0.805854
1.12129	0.79601
1.11831	0.78591
1.11811	0.775128
1.11754	0.764166
1.11633	0.753064
1.11523	0.74225
1.11424	0.731272
1.11456	0.720458
1.11478	0.70965
1.11157	0.698462
1.10901	0.687472
1.1095	0.676554
1.10867	0.665652
1.10743	0.654824
1.10637	0.644006
1.10544	0.633208
1.10439	0.6223
1.10136	0.611392
1.09928	0.600322
1.09867	0.589348
1.09711	0.57851
1.09484	0.567316
1.09336	0.556334
1.09143	0.545202
1.09228	0.534458
1.09068	0.523466
1.08934	0.512494
1.08779	0.50146
1.08584	0.490352
1.08682	0.479508
1.0839	0.468436
1.08227	0.457462
1.0804	0.44649
1.07708	0.43546
1.0782	0.424552
1.07669	0.41371
1.0752	0.402652
1.07345	0.391736
1.07302	0.380788
1.07012	0.36991
1.06915	0.358964
1.06707	0.34825
1.06492	0.33757
1.06489	0.32682
1.06221	0.315944
1.06005	0.304898
1.05847	0.293276
1.05674	0.281712
1.05439	0.270232
1.05087	0.258608
1.04935	0.246988
1.04742	0.236112
1.04818	0.225688
1.0432	0.214648
1.04334	0.203738
1.0427	0.192592
1.04066	0.181652
1.03996	0.170722
1.03915	0.159934
1.03556	0.149242
1.03207	0.139186
1.03073	0.128366
1.02929	0.116738
1.02783	0.105032
1.024	0.093384
1.02286	0.081678
1.02027	0.070264
1.01919	0.059182
1.01626	0.048452
1.01166	0.037666
1.00918	0.026888
1.00825	0.01624
1.00313	0.00544
0.999725	0
0	0
0	0
-2.96275	-0.056262
-2.59395	-0.052082
-2.15844	-0.048046
-1.82185	-0.043946
-1.62184	-0.03988
-1.36933	-0.035974
-1.03156	-0.031934
-0.62691	-0.027752
-0.19983	-0.023644
-0.0641522	-0.019662
-0.0474048	-0.01576
-0.0313197	-0.011828
-0.026961	-0.00792
-0.0102583	-0.003916
0	0
0.00402438	0.003984
0.0115444	0.007916
0.0344525	0.01183
0.0384125	0.015822
0.052114	0.019776
0.0827114	0.02
0.125583	0.020002
0.129335	0.030342
0.138044	0.041538
0.143909	0.051918
0.149171	0.06311
0.162793	0.074946
0.175271	0.086996
0.19122	0.098998
0.207743	0.110232
0.222724	0.121494
0.237363	0.132606
0.256612	0.145202
0.276669	0.158544
0.29553	0.17102
0.317348	0.182774
0.332048	0.195552
0.343268	0.206718
0.352202	0.217192
0.367003	0.227992
0.377603	0.239046
0.387053	0.250148
0.39899	0.26103
0.412833	0.272708
0.423255	0.28416
0.432308	0.295162
0.443803	0.307358
0.45671	0.319618
0.469066	0.331898
0.480383	0.343718
0.488964	0.35501
0.500126	0.366684
0.511855	0.378926
0.523129	0.390604
0.534459	0.401516
0.546469	0.4123
0.556994	0.423706
0.567809	0.435136
0.578001	0.446872
0.587316	0.458514
0.597464	0.469698
0.606349	0.481618
0.618438	0.49232
0.624263	0.503396
0.633377	0.514908
0.644331	0.527734
0.656135	0.540612
0.662184	0.55204
0.67361	0.563338
0.683359	0.574606
0.689302	0.585434
0.697646	0.597966
0.70735	0.609944
0.714002	0.6211
0.72456	0.63279
0.734437	0.644602
0.74511	0.65675
0.752292	0.668484
0.761938	0.680226
0.766291	0.691494
0.775256	0.702586
0.783509	0.7148
0.791172	0.727526
0.799894	0.738914
0.809696	0.75039
0.819264	0.762126
0.8296	0.774798
0.83789	0.78835
0.844868	0.798936
0.853608	0.810058
0.859182	0.821152
0.865671	0.833098
0.872366	0.84501
0.879645	0.85659
0.88486	0.867792
0.893314	0.879538
0.90115	0.892178
0.908476	0.904072
0.91458	0.915538
0.920478	0.927028
0.929611	0.938374
0.938047	0.949678
0.94191	0.960794
0.946342	0.971704
0.955181	0.984962
0.962591	0.996152
0.970416	1
1.12288	1
1.1212	0.989572
1.12044	0.979756
1.12244	0.969646
1.11958	0.959348
1.12012	0.949546
1.11756	0.938032
1.11567	0.927364
1.11619	0.916998
1.11539	0.906528
1.11325	0.89555
1.11298	0.884092
1.11318	0.872972
1.11243	0.86292
1.10936	0.852298
1.1097	0.840834
1.10844	0.829422
1.10852	0.817948
1.1079	0.807004
1.10549	0.796972
1.10402	0.786918
1.10294	0.776146
1.10062	0.76502
1.10149	0.753762
1.10077	0.74373
1.10014	0.733206
1.09743	0.722362
1.09476	0.710868
1.09488	0.699358
1.0928	0.688144
1.09136	0.677428
1.09239	0.666648
1.09047	0.655768
1.08934	0.645168
1.08953	0.634764
1.08582	0.623742
1.08463	0.612838
1.08516	0.602232
1.08269	0.591712
1.0804	0.58064
1.08054	0.569762
1.07901	0.558792
1.07757	0.54776
1.07743	0.536894
1.07459	0.525894
1.07523	0.514896
1.07416	0.504016
1.06914	0.493164
1.06905	0.482074
1.06672	0.471064
1.06709	0.460364
1.06509	0.45014
1.064	0.439462
1.0621	0.428816
1.06037	0.417984
1.05864	0.406386
1.05893	0.394948
1.05705	0.38377
1.05713	0.37321
1.05439	0.362194
1.05206	0.350732
1.05219	0.33932
1.04909	0.327902
1.04847	0.31728
1.04581	0.306502
1.04495	0.295544
1.04384	0.284762
1.03958	0.274012
1.037	0.26325
1.03763	0.252342
1.03583	0.241338
1.0319	0.230562
1.03176	0.219866
1.0323	0.209134
1.02918	0.198658
1.02723	0.18792
1.02353	0.177424
1.01946	0.166664
1.01855	0.156132
1.01454	0.145396
1.01244	0.134796
1.01345	0.124208
1.00943	0.113742
1.00806	0.103236
1.0069	0.0927
1.00469	0.081812
1.00079	0.071046
0.997815	0.060672
0.997048	0.050222
0.995645	0.039652
0.992758	0.028634
0.990024	0.017736
0.985076	0.006842
0.983335	0
0	0
0	0
-3.56365	-0.057172
-3.161	-0.05307
-2.71721	-0.048906
-2.31485	-0.044676
-1.87841	-0.040604
-1.43391	-0.036648
-0.931361	-0.032566
-0.506165	-0.02835
-0.19274	-0.02422
-0.087391	-0.020118
-0.0427367	-0.016168
-0.0322956	-0.012068
-0.025443	-0.007952
-0.0164643	-0.003888
0	0
0.0177615	0.00412
0.0269729	0.00822
0.0394506	0.012408
0.0483689	0.0163
0.0584052	0.020382
0.0596685	0.020382
0.142634	0.020384
0.146878	0.030896
0.156328	0.041854
0.164169	0.052306
0.171458	0.063988
0.181593	0.074772
0.194548	0.085986
0.206016	0.097358
0.222183	0.108342
0.237886	0.11958
0.257284	0.131162
0.272012	0.142318
0.294209	0.154492
0.311838	0.168194
0.323262	0.17916
0.337313	0.190126
0.350797	0.202198
0.361107	0.213204
0.372673	0.223898
0.382729	0.234904
0.397639	0.246178
0.409406	0.257788
0.417622	0.269086
0.42713	0.280784
0.438406	0.292038
0.454604	0.303988
0.463144	0.315188
0.475386	0.326358
0.489363	0.338082
0.501259	0.349924
0.514618	0.361482
0.527203	0.372994
0.536845	0.384216
0.546711	0.395232
0.558868	0.406566
0.571155	0.417776
0.58161	0.428962
0.592726	0.440186
0.600379	0.45135
0.612159	0.463972
0.618865	0.476256
0.627502	0.488172
0.635069	0.50035
0.646633	0.512182
0.653103	0.523518
0.666352	0.534874
0.67538	0.54651
0.682506	0.557748
0.690961	0.569134
0.698702	0.580338
0.705916	0.59142
0.71375	0.60198
0.725654	0.614614
0.732252	0.627782
0.739816	0.638568
0.748293	0.650786
0.757288	0.66264
0.766352	0.673992
0.774426	0.68526
0.785172	0.696892
0.791453	0.709314
0.799992	0.72173
0.810445	0.732804
0.820802	0.744406
0.83006	0.756274
0.836846	0.768182
0.847204	0.781088
0.854482	0.79177
0.863783	0.802778
0.871419	0.814914
0.880432	0.827156
0.887309	0.83937
0.896217	0.850928
0.90258	0.8633
0.909472	0.875782
0.916431	0.886864
0.9252	0.898184
0.932234	0.90957
0.940073	0.920466
0.949119	0.933048
0.956055	0.945176
0.962931	0.956918
0.970582	0.969082
0.978157	0.981964
0.986169	0.993184
0.994402	1
1.24152	1
1.24121	0.989576
1.24306	0.979568
1.24048	0.96843
1.23755	0.958296
1.238	0.94765
1.23726	0.936472
1.23537	0.925196
1.23461	0.913926
1.23395	0.902846
1.23256	0.891442
1.23153	0.880288
1.22984	0.869084
1.23058	0.857834
1.23045	0.847282
1.22783	0.836478
1.22895	0.825724
1.22913	0.815452
1.2266	0.804968
1.22273	0.794998
1.22388	0.784636
1.22144	0.773166
1.22055	0.762136
1.21987	0.750766
1.2174	0.739556
1.21619	0.72819
1.21746	0.717294
1.21541	0.70685
1.21438	0.696482
1.2144	0.685778
1.21189	0.675206
1.21152	0.664828
1.21054	0.654212
1.21002	0.643318
1.20865	0.632242
1.20565	0.62132
1.20372	0.61029
1.20233	0.599486
1.20435	0.588668
1.20079	0.578042
1.19965	0.567272
1.20039	0.555886
1.19871	0.544472
1.19588	0.533108
1.19458	0.521696
1.19286	0.510478
1.19056	0.499778
1.19137	0.488878
1.18939	0.478148
1.18749	0.467476
1.18474	0.456784
1.18512	0.446026
1.18343	0.435164
1.18272	0.42429
1.17823	0.413392
1.17869	0.402294
1.1779	0.39151
1.17599	0.380796
1.17377	0.370086
1.1725	0.35947
1.17141	0.348042
1.16832	0.337098
1.16653	0.326476
1.1665	0.316026
1.16714	0.305682
1.16467	0.294808
1.16311	0.283978
1.16127	0.27402
1.16025	0.26375
1.15936	0.25289
1.15521	0.241492
1.15215	0.230106
1.15066	0.218574
1.14909	0.207166
1.14642	0.196292
1.14644	0.185926
1.14391	0.174492
1.14385	0.162994
1.14077	0.151424
1.13894	0.139874
1.13778	0.128282
1.13265	0.117166
1.13237	0.106276
1.13202	0.095498
1.12728	0.084914
1.12576	0.074082
1.12222	0.063378
1.12081	0.052326
1.11899	0.041722
1.1151	0.030978
1.11182	0.020218
1.11062	0.009468
1.1088	0
0	0
0	0
-3.67046	-0.055458
-3.30343	-0.051596
-2.91488	-0.04764
-2.49228	-0.043806
-1.99523	-0.039556
-1.54937	-0.035426
-1.15719	-0.031536
-0.75033	-0.027502
-0.410815	-0.023438
-0.126978	-0.019524
-0.0724974	-0.015562
-0.0505633	-0.011668
-0.0339148	-0.007708
-0.0184193	-0.00395
0	0
0.00966574	0.004168
0.0204901	0.008298
0.0245833	0.012264
0.0342773	0.016176
0.0431352	0.020096
0.0463097	0.020096
0.118603	0.020096
0.122792	0.030876
0.134343	0.042494
0.143748	0.054588
0.152447	0.069474
0.166816	0.082578
0.182443	0.095924
0.200427	0.10809
0.219649	0.11884
0.243631	0.129926
0.261964	0.14107
0.279065	0.152428
0.292128	0.16515
0.306556	0.17569
0.317729	0.186512
0.326516	0.19776
0.336184	0.209426
0.3463	0.219752
0.359266	0.230612
0.371954	0.242126
0.38199	0.253354
0.396761	0.26495
0.41093	0.27678
0.425357	0.288514
0.435854	0.300152
0.446048	0.311436
0.46021	0.32299
0.474796	0.335688
0.485721	0.348264
0.495306	0.35992
0.504211	0.371252
0.514245	0.382694
0.524532	0.394042
0.536134	0.405668
0.546832	0.41714
0.558647	0.42987
0.566635	0.441564
0.578989	0.45329
0.589929	0.464882
0.600118	0.477158
0.612262	0.48909
0.621484	0.500578
0.629177	0.511736
0.638785	0.524404
0.649697	0.537392
0.658112	0.548148
0.667332	0.559084
0.67849	0.57138
0.689989	0.584622
0.69678	0.595352
0.708056	0.606758
0.71734	0.619232
0.724005	0.630374
0.732052	0.642126
0.738152	0.654354
0.747103	0.665898
0.754259	0.67723
0.762875	0.688144
0.769923	0.699482
0.777169	0.711296
0.782871	0.722878
0.790539	0.734578
0.796127	0.746316
0.806619	0.757938
0.812961	0.76952
0.821034	0.781986
0.83115	0.793386
0.83795	0.805246
0.844805	0.816476
0.853471	0.827694
0.861189	0.839366
0.868967	0.850156
0.877151	0.862148
0.885981	0.874528
0.894003	0.886844
0.902861	0.898766
0.911579	0.910114
0.91868	0.921946
0.926753	0.934282
0.934093	0.945536
0.939996	0.9574
0.944928	0.969658
0.952446	0.982128
0.957832	0.993046
0.962763	1
1.19603	0.999998
1.19738	0.989838
1.19505	0.979648
1.19319	0.969848
1.19252	0.959702
1.19099	0.94956
1.18907	0.939144
1.18949	0.928312
1.18772	0.917484
1.1871	0.906642
1.18568	0.895828
1.18648	0.885062
1.18542	0.87443
1.18363	0.863658
1.18357	0.852114
1.18106	0.840802
1.18013	0.829586
1.17768	0.818966
1.17796	0.807848
1.17576	0.797372
1.17433	0.786628
1.17429	0.775762
1.17367	0.765358
1.17288	0.754668
1.17144	0.74384
1.17063	0.732364
1.1688	0.721004
1.16655	0.709528
1.16672	0.69796
1.16354	0.6866
1.16278	0.67516
1.16144	0.663648
1.16338	0.652304
1.16122	0.640942
1.1607	0.630186
1.15942	0.620216
1.15966	0.610088
1.15821	0.600318
1.15708	0.590426
1.15421	0.580454
1.15351	0.570358
1.15138	0.560474
1.1509	0.550378
1.14863	0.54036
1.14754	0.530486
1.14742	0.52075
1.14548	0.510682
1.14485	0.500796
1.14441	0.491048
1.14469	0.481206
1.14092	0.471244
1.1384	0.460912
1.13842	0.450268
1.13624	0.439452
1.13454	0.42863
1.13221	0.417646
1.13154	0.406924
1.13092	0.396474
1.1295	0.386144
1.12785	0.375504
1.1259	0.364686
1.12323	0.353718
1.12147	0.343154
1.11956	0.33242
1.11949	0.321758
1.11564	0.311206
1.11357	0.3007
1.11298	0.289148
1.10983	0.277728
1.11071	0.266394
1.10727	0.254814
1.10667	0.24338
1.10482	0.231848
1.10392	0.220418
1.10099	0.209008
1.09508	0.197864
1.09407	0.18707
1.09276	0.176238
1.08996	0.16554
1.08852	0.154816
1.08769	0.14437
1.08479	0.13345
1.0828	0.121934
1.07945	0.110426
1.07829	0.098884
1.07469	0.087778
1.0735	0.076926
1.07119	0.065666
1.0681	0.054406
1.06423	0.04322
1.06169	0.031848
1.0572	0.020756
1.05359	0.009144
1.05089	0
0	0
0	0
-3.16547	-0.057086
-2.76182	-0.052942
-2.41489	-0.048656
-2.10744	-0.044582
-1.73441	-0.040414
-1.32656	-0.036184
-0.924974	-0.032054
-0.503931	-0.028098
-0.0967044	-0.0241
-0.0622503	-0.020116
-0.0519265	-0.01619
-0.0425675	-0.012392
-0.0270548	-0.008222
-0.0132799	-0.00408
0	0
0.00920906	0.004226
0.020962	0.0081
0.0238868	0.012036
0.0373251	0.015926
0.0449934	0.019796
0.0734503	0.02
0.116298	0.02
0.123131	0.030362
0.130819	0.041572
0.136779	0.05196
0.147898	0.065266
0.15848	0.076142
0.166274	0.087246
0.176796	0.0982
0.190429	0.109832
0.211362	0.121362
0.230786	0.13311
0.249602	0.14475
0.268509	0.156564
0.287109	0.169638
0.300426	0.180982
0.312026	0.192048
0.326094	0.203414
0.33471	0.21428
0.349595	0.224834
0.361024	0.237184
0.372359	0.248408
0.385858	0.260206
0.396344	0.272622
0.408018	0.28363
0.418633	0.294932
0.432989	0.306652
0.444413	0.317484
0.455453	0.328078
0.470687	0.340552
0.484222	0.35256
0.495063	0.363964
0.503947	0.374926
0.516476	0.387326
0.525297	0.397872
0.537845	0.410366
0.549096	0.423662
0.559357	0.435228
0.571082	0.446552
0.580039	0.458048
0.586362	0.46977
0.595836	0.480946
0.60879	0.492758
0.618989	0.505148
0.62692	0.516124
0.6329	0.527124
0.639122	0.538636
0.650605	0.550562
0.656039	0.56177
0.664234	0.572848
0.673034	0.58391
0.679485	0.595862
0.687629	0.608156
0.698063	0.619394
0.708484	0.630546
0.71596	0.642752
0.722872	0.654896
0.730965	0.666002
0.741843	0.677706
0.749131	0.689226
0.754233	0.700558
0.766671	0.712758
0.773372	0.723954
0.781296	0.736682
0.788768	0.747706
0.793946	0.758588
0.807275	0.771212
0.816884	0.784268
0.825102	0.795714
0.830665	0.807068
0.839512	0.818356
0.848416	0.829774
0.854727	0.840992
0.862512	0.852278
0.870088	0.863436
0.877587	0.874148
0.885022	0.886796
0.892996	0.898732
0.901494	0.91181
0.911083	0.923484
0.916056	0.935
0.9233	0.946088
0.92994	0.957372
0.939285	0.969134
0.946134	0.983104
0.951395	0.995346
0.957717	1
1.19798	1
1.19595	0.989852
1.19483	0.9798
1.19377	0.969952
1.19265	0.959996
1.19105	0.949582
1.19044	0.938458
1.18915	0.927442
1.18717	0.916466
1.18742	0.905674
1.18686	0.894454
1.18445	0.883626
1.18386	0.872778
1.18263	0.861548
1.18313	0.850074
1.18094	0.838798
1.17955	0.827664
1.18053	0.817112
1.17926	0.806448
1.17757	0.796382
1.17658	0.785842
1.17518	0.774866
1.17199	0.764472
1.1724	0.753476
1.17209	0.742458
1.17149	0.731484
1.17024	0.72069
1.16874	0.709712
1.1669	0.69895
1.16454	0.68865
1.16369	0.677692
1.16129	0.66684
1.16099	0.655888
1.15956	0.645072
1.15829	0.634242
1.15596	0.623314
1.15542	0.612452
1.15304	0.601516
1.15257	0.590578
1.15073	0.579802
1.15185	0.569018
1.15058	0.558008
1.14723	0.546866
1.14651	0.53601
1.14752	0.525248
1.14353	0.514062
1.14236	0.503076
1.13981	0.49206
1.13887	0.481056
1.13754	0.47058
1.13581	0.460466
1.13558	0.449908
1.13301	0.438912
1.12935	0.427848
1.13106	0.416756
1.12794	0.405716
1.1267	0.395244
1.12666	0.384454
1.1253	0.373484
1.12483	0.363116
1.12307	0.35303
1.12146	0.343018
1.11968	0.333024
1.11819	0.32228
1.11729	0.310652
1.11547	0.299744
1.1137	0.289374
1.11167	0.278534
1.11253	0.267672
1.11087	0.256648
1.10845	0.245718
1.10609	0.234778
1.10294	0.224018
1.10073	0.213096
1.10042	0.202258
1.09707	0.191512
1.09579	0.180556
1.09286	0.169624
1.08965	0.158978
1.08558	0.148716
1.08412	0.137914
1.08231	0.126538
1.07956	0.115322
1.07618	0.104348
1.07663	0.093254
1.0747	0.082464
1.07096	0.072274
1.06689	0.061576
1.06563	0.051248
1.06429	0.040656
1.06307	0.030108
1.06116	0.019528
1.0561	0.009124
1.05196	0
0	0
0	0
-3.56976	-0.05655
-3.18444	-0.052348
-2.70696	-0.048424
-2.23152	-0.044436
-1.78233	-0.04036
-1.34569	-0.036232
-0.965947	-0.031996
-0.543195	-0.027946
-0.226187	-0.023748
-0.0482965	-0.019776
-0.0344582	-0.01589
-0.0207763	-0.01194
-0.0197901	-0.007846
-0.00529634	-0.003978
0	0
0.0138814	0.003916
0.0245912	0.007928
0.0447278	0.011888
0.0561142	0.015836
0.071096	0.01979
0.104137	0.02
0.14263	0.02
0.151652	0.031848
0.158294	0.043808
0.16883	0.056418
0.175645	0.071734
0.184361	0.082246
0.20018	0.094446
0.216788	0.10617
0.234891	0.117142
0.252275	0.12923
0.271415	0.141664
0.291823	0.154196
0.30679	0.16645
0.32463	0.178498
0.336471	0.189574
0.342519	0.200232
0.358962	0.211646
0.372423	0.221954
0.386024	0.232832
0.402912	0.244854
0.41078	0.256428
0.424414	0.268808
0.431349	0.280836
0.443912	0.292608
0.453609	0.304104
0.465405	0.315406
0.474812	0.326652
0.486317	0.337304
0.497317	0.348624
0.509375	0.36033
0.520304	0.371546
0.532363	0.383424
0.543119	0.394758
0.553616	0.407088
0.567407	0.420188
0.577017	0.431076
0.588923	0.441944
0.601594	0.454838
0.609272	0.466292
0.622179	0.478376
0.630195	0.490126
0.637241	0.500848
0.648242	0.512552
0.657014	0.524812
0.666475	0.536028
0.676891	0.547642
0.684472	0.559398
0.692704	0.570638
0.7018	0.581926
0.71093	0.593632
0.717529	0.604696
0.725849	0.615504
0.735418	0.628188
0.744216	0.641256
0.749575	0.65262
0.758782	0.664722
0.765634	0.676388
0.772651	0.68767
0.780338	0.699052
0.788844	0.711512
0.79422	0.723036
0.801946	0.735346
0.808033	0.746242
0.815948	0.758512
0.822201	0.770716
0.828417	0.782502
0.835723	0.795266
0.841742	0.805936
0.84766	0.817294
0.855171	0.829014
0.862855	0.840836
0.870391	0.851964
0.87799	0.863336
0.887149	0.875034
0.893158	0.886308
0.902634	0.897512
0.91394	0.909272
0.922066	0.921128
0.93018	0.93284
0.937746	0.94431
0.945101	0.95538
0.952025	0.968186
0.960293	0.979022
0.969719	0.992532
0.974488	1
1.21544	0.999998
1.21521	0.989758
1.21497	0.979894
1.21243	0.97001
1.21071	0.959816
1.20905	0.949258
1.20785	0.938656
1.20866	0.927858
1.20541	0.916608
1.20636	0.906428
1.20593	0.895124
1.20417	0.88378
1.20223	0.872152
1.20071	0.860648
1.19975	0.849256
1.19944	0.837838
1.2008	0.82688
1.20056	0.81628
1.19859	0.805906
1.19513	0.795898
1.19364	0.785558
1.19372	0.775112
1.19365	0.764644
1.19182	0.753798
1.19141	0.742644
1.19045	0.731886
1.18844	0.72104
1.18698	0.710382
1.18427	0.699566
1.18421	0.688806
1.1843	0.678246
1.18171	0.667974
1.18184	0.657042
1.18064	0.646264
1.17727	0.635414
1.17623	0.624184
1.17659	0.613568
1.17508	0.603112
1.17326	0.592224
1.17199	0.581424
1.1717	0.570588
1.17119	0.560034
1.16798	0.54895
1.16757	0.537916
1.16682	0.526916
1.16519	0.515962
1.16244	0.50464
1.16198	0.493434
1.1619	0.48234
1.15891	0.471336
1.15822	0.46026
1.1551	0.44924
1.15505	0.43787
1.15252	0.426736
1.15038	0.415524
1.14853	0.404368
1.14912	0.393206
1.14625	0.382298
1.14236	0.371092
1.14292	0.36009
1.1416	0.349038
1.14063	0.33813
1.13834	0.327036
1.13741	0.31588
1.13659	0.304968
1.13486	0.293786
1.13264	0.282648
1.13068	0.271756
1.12861	0.260674
1.12547	0.249736
[truncated: 18,272 more rows]

## Sheet: DNA + Excipients
Normalized Depth (nm)	Normalized Load (mN)
-3.38758	-0.060472
-3.01404	-0.056504
-2.60414	-0.05249
-2.18415	-0.048392
-1.79653	-0.044342
-1.35901	-0.040206
-0.962606	-0.036214
-0.55661	-0.032176
-0.180155	-0.028022
-0.0934049	-0.023862
-0.0813914	-0.019658
-0.0636707	-0.01571
-0.0471972	-0.011706
-0.020192	-0.007778
-0.0118813	-0.003832
0	0
0.00991964	0.003986
0.0166662	0.008156
0.031926	0.012006
0.0389548	0.015934
0.071068	0.02
0.0803718	0.02
0.0870463	0.031228
0.0944484	0.042926
0.101685	0.054276
0.109712	0.06492
0.12013	0.076494
0.134663	0.088542
0.149176	0.100024
0.164753	0.111398
0.183215	0.12341
0.200845	0.135188
0.213104	0.14644
0.228471	0.15868
0.242939	0.170024
0.259411	0.18166
0.27193	0.193334
0.281001	0.20457
0.293028	0.214976
0.302441	0.225806
0.319229	0.238604
0.332241	0.250776
0.342079	0.26255
0.350937	0.273944
0.363883	0.285086
0.371539	0.296378
0.384388	0.307898
0.391441	0.319444
0.402998	0.331218
0.412383	0.344028
0.422078	0.35523
0.430584	0.366812
0.439932	0.378998
0.448275	0.390408
0.46021	0.402282
0.470128	0.414296
0.476474	0.42627
0.486247	0.438368
0.493175	0.449622
0.502284	0.46022
0.512765	0.472122
0.522475	0.484418
0.53095	0.496816
0.541301	0.508988
0.547417	0.520766
0.554111	0.531586
0.55965	0.543624
0.568401	0.557066
0.576441	0.568318
0.582177	0.580906
0.590229	0.592018
0.599275	0.604002
0.606772	0.615808
0.615649	0.628008
0.623653	0.63903
0.628351	0.650856
0.635156	0.663326
0.641101	0.674948
0.649243	0.686242
0.655107	0.697764
0.659059	0.710018
0.667169	0.722032
0.672689	0.73293
0.679121	0.74424
0.684868	0.754698
0.692603	0.767362
0.701616	0.782016
0.706042	0.792922
0.711728	0.803854
0.721006	0.816458
0.728347	0.828578
0.729034	0.84001
0.737283	0.851154
0.743311	0.862864
0.751601	0.875124
0.754565	0.8871
0.759089	0.898646
0.764113	0.91002
0.768794	0.92126
0.775267	0.932696
0.781645	0.944016
0.789522	0.955932
0.793174	0.967736
0.798991	0.979784
0.804568	0.991038
0.807804	1
0.655273	0.999998
0.65435	0.990072
0.655641	0.98006
0.657179	0.969914
0.654604	0.959614
0.652732	0.949424
0.652802	0.938776
0.649328	0.928276
0.649633	0.917708
0.648615	0.906826
0.647296	0.895754
0.648623	0.884702
0.645482	0.873906
0.645401	0.862914
0.644843	0.851944
0.642509	0.840992
0.642031	0.8301
0.642527	0.819204
0.640939	0.808454
0.639732	0.798408
0.637136	0.788576
0.636616	0.778114
0.635127	0.76725
0.63443	0.756412
0.635466	0.74539
0.633596	0.7346
0.631072	0.723696
0.629989	0.712156
0.629628	0.701368
0.629205	0.691484
0.62839	0.68081
0.628544	0.6694
0.626186	0.657924
0.623945	0.646604
0.620939	0.635196
0.62266	0.62375
0.621296	0.61327
0.618222	0.602808
0.616779	0.591236
0.616136	0.579646
0.614868	0.568208
0.61557	0.556812
0.612977	0.5453
0.612704	0.533724
0.612973	0.522256
0.609807	0.510816
0.608769	0.499602
0.606028	0.488832
0.607019	0.478114
0.603037	0.467398
0.603286	0.456616
0.601287	0.445868
0.599449	0.435046
0.598862	0.424364
0.597828	0.413644
0.59346	0.402972
0.593671	0.392168
0.592091	0.381362
0.591676	0.370552
0.590295	0.359892
0.588213	0.349228
0.585737	0.338376
0.585272	0.327596
0.582796	0.31681
0.582274	0.30611
0.580853	0.294828
0.578462	0.283816
0.578086	0.272504
0.576231	0.261268
0.574877	0.25004
0.572613	0.23906
0.57178	0.227756
0.566902	0.216526
0.566559	0.205414
0.563572	0.194088
0.560746	0.182878
0.557648	0.171688
0.556493	0.160422
0.553551	0.149198
0.549664	0.13791
0.546771	0.126636
0.542468	0.115384
0.539039	0.103982
0.535382	0.093212
0.534571	0.083272
0.530661	0.072624
0.527202	0.062012
0.522028	0.051608
0.5123	0.040818
0.509539	0.029208
0.503521	0.01794
0.496836	0.007432
0.487488	0
0	0
0	0
-3.15777	-0.056498
-2.78698	-0.052404
-2.45136	-0.04835
-2.02225	-0.044372
-1.56332	-0.040336
-1.11467	-0.036282
-0.760254	-0.032318
-0.491913	-0.028346
-0.302001	-0.02443
-0.0506507	-0.020396
-0.0442181	-0.016176
-0.0294752	-0.012054
-0.0241393	-0.00787
-0.00406424	-0.003986
0	0
0.0120185	0.00395
0.0200133	0.007894
0.036404	0.011868
0.0483506	0.015874
0.0652594	0.019876
0.0839392	0.02
0.0762266	0.02
0.0791089	0.030432
0.0864071	0.041452
0.0967235	0.052014
0.10814	0.063534
0.11728	0.074848
0.129199	0.086296
0.14115	0.097192
0.162524	0.108616
0.179826	0.120162
0.198527	0.131824
0.214101	0.144264
0.23121	0.156296
0.245587	0.168248
0.259452	0.179558
0.274987	0.190776
0.289751	0.202908
0.296637	0.214196
0.311048	0.224978
0.323671	0.2373
0.333191	0.249924
0.344349	0.26115
0.355057	0.272846
0.367082	0.285058
0.37622	0.296634
0.384201	0.307698
0.395068	0.31863
0.405078	0.329702
0.414441	0.341824
0.424027	0.353582
0.432246	0.365022
0.443549	0.376014
0.452243	0.387446
0.462051	0.39929
0.471546	0.411516
0.48268	0.423436
0.491662	0.433812
0.501678	0.44641
0.511151	0.459426
0.518283	0.470632
0.526123	0.481946
0.533326	0.493428
0.545331	0.505034
0.552841	0.517022
0.561116	0.529498
0.567692	0.540956
0.575073	0.553642
0.579474	0.566554
0.586466	0.577292
0.595852	0.588992
0.602087	0.600994
0.609706	0.612246
0.617806	0.623196
0.623573	0.634226
0.630046	0.646088
0.635206	0.658646
0.640875	0.670432
0.649646	0.681368
0.656263	0.693358
0.662588	0.704808
0.668081	0.716446
0.676037	0.727958
0.680361	0.740834
0.687711	0.751928
0.693877	0.76463
0.701405	0.777986
0.704386	0.788646
0.712505	0.79996
0.719597	0.811726
0.725117	0.823576
0.732935	0.834902
0.73804	0.846218
0.74512	0.857918
0.751115	0.870232
0.757549	0.882034
0.761624	0.8934
0.766834	0.90484
0.771271	0.915634
0.775831	0.926842
0.779123	0.937756
0.787161	0.94884
0.793769	0.959808
0.799569	0.97112
0.806999	0.98402
0.809473	0.995004
0.813594	1
0.678504	1
0.676967	0.990014
0.677846	0.98021
0.676661	0.970146
0.675159	0.960134
0.675577	0.949758
0.675175	0.93883
0.672294	0.928574
0.672249	0.917184
0.668606	0.90568
0.670237	0.894126
0.668216	0.882538
0.6672	0.870902
0.665747	0.8596
0.666124	0.848132
0.665456	0.836506
0.663514	0.824954
0.664136	0.813362
0.661649	0.80218
0.660927	0.792236
0.658496	0.782092
0.657677	0.77136
0.660729	0.760628
0.65575	0.749594
0.653883	0.738766
0.653561	0.727974
0.654431	0.717108
0.653909	0.706324
0.651539	0.695396
0.650148	0.684394
0.648089	0.673402
0.647192	0.662504
0.647344	0.651582
0.64799	0.641134
0.646429	0.630344
0.646114	0.618876
0.644106	0.60724
0.64057	0.595922
0.640817	0.585154
0.639945	0.574204
0.638486	0.563374
0.635972	0.55269
0.6335	0.541978
0.632705	0.53118
0.632792	0.520406
0.631293	0.509644
0.630999	0.498834
0.630083	0.488034
0.627196	0.47719
0.626549	0.466536
0.62403	0.455594
0.623681	0.444794
0.625773	0.434082
0.621641	0.42357
0.621175	0.413106
0.620911	0.401964
0.617718	0.39093
0.61772	0.380262
0.616214	0.369966
0.614988	0.358922
0.61466	0.348006
0.611668	0.33721
0.612195	0.326378
0.611019	0.31523
0.608169	0.304296
0.607677	0.293324
0.603213	0.282438
0.603087	0.271482
0.603283	0.2606
0.597646	0.249582
0.597307	0.238898
0.597706	0.22858
0.596283	0.21755
0.591868	0.206464
0.590041	0.195662
0.587334	0.184828
0.58573	0.174182
0.583281	0.163392
0.580592	0.152318
0.579115	0.141388
0.577726	0.130786
0.574545	0.120384
0.572588	0.109832
0.568621	0.099016
0.565753	0.0882
0.562729	0.077154
0.560257	0.066322
0.556718	0.055388
0.553232	0.04476
0.548811	0.03439
0.545702	0.023984
0.541639	0.013418
0.537411	0.002778
0.53502	0
0	0
0	0
-3.71232	-0.057418
-3.39996	-0.053286
-3.09622	-0.049472
-2.56951	-0.045474
-1.94489	-0.041348
-1.43462	-0.037126
-1.03579	-0.033166
-0.786962	-0.028876
-0.433284	-0.024658
-0.056622	-0.020462
-0.031811	-0.01626
-0.0324184	-0.012138
-0.0207114	-0.008036
-0.00851739	-0.004086
0	0
0.0182844	0.004164
0.030677	0.008144
0.0421081	0.012282
0.0511949	0.01621
0.0607716	0.02013
0.0596871	0.02013
0.0861819	0.020132
0.0937306	0.03068
0.0963999	0.0416
0.104792	0.052152
0.116488	0.063956
0.127007	0.07596
0.138113	0.087146
0.156645	0.098876
0.174783	0.111028
0.190814	0.12259
0.208827	0.134088
0.223183	0.144978
0.235623	0.156508
0.251965	0.16873
0.265045	0.17995
0.279309	0.191672
0.28789	0.203516
0.299007	0.213834
0.311276	0.224798
0.324464	0.236156
0.339083	0.248776
0.351441	0.260352
0.364839	0.272156
0.374376	0.283908
0.382998	0.294908
0.392169	0.306538
0.402656	0.318452
0.410492	0.32996
0.418158	0.340958
0.428393	0.352232
0.439813	0.36395
0.450399	0.375296
0.459323	0.386796
0.470634	0.398284
0.480488	0.409948
0.488809	0.422158
0.498345	0.434538
0.508023	0.446778
0.513809	0.459044
0.522875	0.469736
0.531909	0.481174
0.538433	0.49262
0.549035	0.50414
0.553601	0.514788
0.562476	0.526138
0.569142	0.537686
0.576689	0.549296
0.582839	0.560316
0.592464	0.572144
0.599936	0.584276
0.604184	0.595738
0.611199	0.606922
0.619737	0.619146
0.62768	0.631394
0.633447	0.64307
0.638272	0.654252
0.643772	0.665958
0.652599	0.677482
0.657989	0.688706
0.663104	0.699518
0.669917	0.711052
0.675973	0.722584
0.680614	0.733582
0.6867	0.744836
0.695374	0.756728
0.701043	0.768158
0.706501	0.77992
0.713634	0.79194
0.722222	0.804416
0.72634	0.815938
0.731392	0.827078
0.739057	0.838854
0.746302	0.851092
0.753809	0.862818
0.759669	0.87447
0.764691	0.885966
0.771931	0.897158
0.777092	0.909006
0.782249	0.92014
0.788743	0.932918
0.79342	0.94454
0.797728	0.956142
0.802089	0.966908
0.811379	0.978154
0.816323	0.992376
0.819538	1
0.748387	1
0.749665	0.989106
0.749494	0.978598
0.749244	0.968476
0.74823	0.958334
0.748638	0.948086
0.745241	0.936896
0.745645	0.925422
0.745278	0.914064
0.741037	0.90271
0.743427	0.891094
0.74208	0.8796
0.741142	0.867982
0.739308	0.856524
0.739248	0.845092
0.737709	0.833608
0.736352	0.82251
0.736348	0.811856
0.732848	0.801764
0.732623	0.791884
0.733261	0.781102
0.733462	0.76978
0.730338	0.758586
0.729377	0.74786
0.729501	0.737244
0.727979	0.726646
0.727159	0.71564
0.72694	0.704706
0.726355	0.693522
0.727433	0.682674
0.725714	0.671698
0.722881	0.660886
0.722631	0.650018
0.720784	0.639032
0.721881	0.628312
0.721973	0.61749
0.71769	0.606142
0.719978	0.594818
0.716103	0.58333
0.716587	0.572288
0.716681	0.561624
0.714987	0.550898
0.71253	0.540208
0.710608	0.529342
0.710082	0.518796
0.71044	0.50801
0.708725	0.496264
0.70703	0.484712
0.7071	0.473104
0.706111	0.463232
0.70422	0.452564
0.703059	0.440826
0.702281	0.429102
0.700819	0.417716
0.698032	0.406234
0.699154	0.394598
0.696904	0.382864
0.693436	0.371828
0.69388	0.361106
0.692647	0.34975
0.69073	0.33858
0.69068	0.327912
0.691005	0.317136
0.687467	0.306672
0.683608	0.296622
0.681881	0.286074
0.682547	0.274218
0.678825	0.26292
0.679221	0.251526
0.676562	0.240098
0.673924	0.228584
0.674715	0.2167
0.670819	0.20531
0.668439	0.195196
0.668717	0.184334
0.666076	0.172704
0.665663	0.161146
0.6595	0.149792
0.658052	0.138054
0.656479	0.126906
0.653861	0.116188
0.652401	0.104704
0.648605	0.093092
0.645864	0.08152
0.643554	0.070094
0.638746	0.058816
0.636096	0.047488
0.634316	0.036952
0.629016	0.026434
0.627211	0.015356
0.62046	0.004576
0.617057	0
0	0
0	0
-3.6019	-0.056552
-3.1504	-0.052446
-2.75462	-0.048438
-2.41343	-0.044542
-2.054	-0.040564
-1.61649	-0.036548
-1.16103	-0.03245
-0.690455	-0.028212
-0.241391	-0.024112
-0.0692928	-0.01998
-0.0620143	-0.016014
-0.0408877	-0.012086
-0.0310431	-0.00785
-0.0129768	-0.003956
0	0
0.0129944	0.003922
0.0304294	0.007882
0.0357968	0.011992
0.0439553	0.015916
0.055156	0.019866
0.0740509	0.02
0.0829824	0.02
0.09107	0.030556
0.101405	0.041984
0.109403	0.05259
0.122169	0.064212
0.137549	0.075472
0.154024	0.087
0.167924	0.098604
0.185546	0.10969
0.200288	0.121006
0.214303	0.132226
0.232408	0.14403
0.244594	0.15601
0.25607	0.167204
0.269972	0.178016
0.281318	0.189464
0.293642	0.201094
0.302188	0.212226
0.31228	0.222682
0.326121	0.233374
0.335511	0.244224
0.346125	0.25543
0.361162	0.267268
0.372502	0.279548
0.385521	0.291386
0.396557	0.303158
0.410067	0.314946
0.422115	0.326228
0.432402	0.338746
0.441801	0.350714
0.452087	0.362288
0.459157	0.373362
0.466179	0.38401
0.476843	0.39643
0.487657	0.408834
0.495688	0.421086
0.504472	0.432202
0.512647	0.44309
0.521622	0.45421
0.531205	0.46541
0.539839	0.477962
0.546879	0.490786
0.55435	0.501528
0.560959	0.512724
0.56937	0.524426
0.577339	0.535552
0.585859	0.547404
0.59508	0.559072
0.603642	0.570214
0.612344	0.582062
0.619757	0.593606
0.625441	0.605162
0.630812	0.616482
0.638751	0.627758
0.644678	0.639496
0.652378	0.65149
0.658633	0.663132
0.665601	0.674416
0.671955	0.686028
0.675973	0.697624
0.685918	0.709186
0.691647	0.720298
0.697489	0.732928
0.705946	0.745386
0.713703	0.756526
0.722013	0.76846
0.728081	0.780628
0.734253	0.792224
0.740171	0.804648
0.746004	0.815328
0.753581	0.828014
0.757476	0.838742
0.763459	0.850222
0.770057	0.862224
0.774581	0.874578
0.779257	0.886216
0.785412	0.897446
0.791953	0.90934
0.795401	0.922
0.798522	0.933502
0.807241	0.944902
0.810077	0.956212
0.813714	0.96718
0.81998	0.978206
0.823193	0.989892
0.829303	1
0.858724	1
0.857119	0.989548
0.856523	0.979556
0.85565	0.969552
0.853673	0.959294
0.852011	0.948748
0.85235	0.938032
0.852442	0.927226
0.851748	0.916342
0.849632	0.90544
0.850835	0.894536
0.849001	0.88399
0.848274	0.873194
0.847927	0.862208
0.846307	0.85172
0.845302	0.841298
0.845766	0.83046
0.842887	0.818922
0.841562	0.807842
0.840991	0.797862
0.841852	0.787952
0.841523	0.777484
0.840333	0.766734
0.840382	0.755724
0.836875	0.744764
0.836275	0.733944
0.836576	0.723402
0.835047	0.7129
0.831978	0.701436
0.832667	0.689936
0.832163	0.678858
0.829541	0.668054
0.828769	0.657144
0.82572	0.646276
0.825987	0.635546
0.824509	0.624774
0.821384	0.61407
0.82098	0.603134
0.819094	0.592326
0.820402	0.581592
0.818623	0.570696
0.817847	0.559936
0.815856	0.548926
0.814544	0.538092
0.815448	0.527372
0.814738	0.516558
0.812954	0.506444
0.812554	0.496102
0.811399	0.485342
0.811661	0.474394
0.809037	0.463744
0.808006	0.452934
0.80529	0.441344
0.804257	0.429534
0.802602	0.418126
0.800973	0.406398
0.800365	0.394864
0.799715	0.383538
0.798412	0.372304
0.796612	0.36154
0.796886	0.350766
0.794775	0.340152
0.792439	0.329446
0.791969	0.318708
0.786419	0.307748
0.790023	0.296886
0.784643	0.286222
0.784575	0.27525
0.781716	0.264406
0.780801	0.253526
0.780566	0.242698
0.776219	0.231678
0.776393	0.221528
0.774605	0.210668
0.771908	0.199736
0.771515	0.189022
0.768749	0.178152
0.766615	0.167368
0.764191	0.15714
0.761648	0.146434
0.759928	0.13555
0.758415	0.124772
0.755223	0.11391
0.754018	0.10317
0.748029	0.092294
0.745165	0.081474
0.742072	0.070534
0.740326	0.05966
0.736072	0.049122
0.732498	0.038788
0.728852	0.028
0.72491	0.017054
0.721076	0.006128
0.717814	0
0	0
0	0
-3.41563	-0.05654
-2.99925	-0.052542
-2.61294	-0.04866
-2.16633	-0.0446
-1.80289	-0.04066
-1.73671	-0.036856
-1.32491	-0.033124
-0.64612	-0.029008
-0.112079	-0.024846
-0.0605971	-0.020722
-0.0487468	-0.0165
-0.0344932	-0.012354
-0.030941	-0.008258
-0.0125378	-0.004152
0	0
0.00169457	0.00413
0.0127716	0.008116
0.026061	0.011992
0.0386594	0.015932
0.0493857	0.019886
0.073418	0.02
0.0891047	0.02
0.0916599	0.030466
0.100605	0.041758
0.107554	0.052472
0.120888	0.062738
0.136336	0.0744
0.154083	0.085862
0.171437	0.098368
0.187727	0.109598
0.202592	0.121124
0.220349	0.132666
0.2326	0.143856
0.248152	0.156158
0.265642	0.169546
0.283291	0.180252
0.294029	0.191554
0.306345	0.20284
0.315663	0.213644
0.327987	0.22424
0.341278	0.236
0.351921	0.247966
0.362053	0.25875
0.378557	0.271148
0.390791	0.28356
0.403653	0.295382
0.412925	0.30698
0.424116	0.318376
0.436116	0.330348
0.443568	0.341958
0.450944	0.35352
0.462638	0.364854
0.471216	0.376258
0.478046	0.387608
0.484365	0.398908
0.494714	0.410246
0.503545	0.42157
0.510158	0.43302
0.518612	0.443728
0.530262	0.455236
0.538135	0.467672
0.546225	0.48011
0.55673	0.491974
0.566071	0.503556
0.571299	0.51458
0.580302	0.526284
0.587463	0.538684
0.59458	0.549912
0.605634	0.562346
0.611817	0.573624
0.619343	0.585172
0.625597	0.596776
0.631478	0.608094
0.638276	0.620622
0.647704	0.63336
0.655995	0.645548
0.662207	0.65751
0.666551	0.66954
0.6744	0.681734
0.679445	0.693742
0.688233	0.705528
0.694693	0.716912
0.698195	0.728546
0.703948	0.740788
0.713275	0.752774
0.719187	0.76415
0.725936	0.77733
0.7324	0.788114
0.736816	0.800368
0.742674	0.81209
0.750124	0.82337
0.757848	0.834912
0.763339	0.84687
0.770427	0.858648
0.774981	0.871158
0.780927	0.88393
0.785818	0.895722
0.790935	0.907154
0.79758	0.918776
0.802199	0.930086
0.806823	0.942772
0.810949	0.953612
0.81828	0.965406
0.8243	0.97768
0.832565	0.99163
0.834891	1
0.942589	1
0.943308	0.98942
0.942622	0.978654
0.940477	0.968708
0.940797	0.958654
0.938827	0.948554
0.937889	0.938368
0.935702	0.927314
0.936402	0.916364
0.93467	0.905684
0.935273	0.8949
0.934161	0.884364
0.934245	0.872746
0.934173	0.861768
0.93148	0.851074
0.930207	0.840288
0.931745	0.82961
0.9309	0.819032
0.92808	0.80845
0.927459	0.79833
0.925545	0.788448
0.924253	0.777618
0.923205	0.76615
0.923778	0.754636
0.922982	0.743234
0.920301	0.731874
0.91739	0.72043
0.918249	0.70893
0.919006	0.697988
0.917736	0.687872
0.917137	0.676944
0.916205	0.666088
0.914156	0.65507
0.914643	0.644396
0.911729	0.63344
0.910122	0.622534
0.910277	0.611712
0.907455	0.60052
0.906677	0.58927
0.906031	0.578362
0.90454	0.567912
0.904043	0.557548
0.902004	0.54612
0.901889	0.53464
0.899516	0.523806
0.90045	0.513104
0.8996	0.502362
0.899626	0.491706
0.89689	0.481004
0.894867	0.470208
0.895832	0.459266
0.894988	0.44865
0.893433	0.437824
0.894498	0.427098
0.892085	0.41637
0.889859	0.4056
0.888052	0.394872
0.885791	0.384278
0.885347	0.37351
0.88496	0.362816
0.882978	0.351978
0.880988	0.341344
0.880065	0.331008
0.879159	0.320008
0.876867	0.30886
0.876138	0.298692
0.873116	0.288166
0.872118	0.276586
0.870505	0.265172
0.867572	0.25367
0.868322	0.242274
0.866471	0.231064
0.86392	0.219262
0.861512	0.208356
0.858693	0.198072
0.856395	0.18757
0.854717	0.177074
0.853679	0.16655
0.853155	0.15607
0.84867	0.145088
0.84792	0.133792
0.846347	0.123084
0.844346	0.112252
0.842367	0.101582
0.837922	0.091078
0.835956	0.080462
0.830941	0.069074
0.827632	0.05764
0.825151	0.046174
0.821294	0.03462
0.818554	0.023264
0.816355	0.012638
0.811935	0.002278
0.808528	0
0	0
0	0
-3.51673	-0.055648
-3.17264	-0.0517
-2.75301	-0.047732
-2.31886	-0.043794
-1.85098	-0.039792
-1.55874	-0.035746
-1.35864	-0.031854
-0.997824	-0.02809
-0.439649	-0.024026
-0.0463511	-0.01999
-0.0418765	-0.016056
-0.0418098	-0.01207
-0.0271835	-0.008172
-0.0151802	-0.004126
0	0
0.00806434	0.004094
0.0210472	0.007982
0.0342984	0.011884
0.0484585	0.015746
0.0556373	0.019658
0.0814954	0.02
0.105293	0.02
0.106982	0.030432
0.118585	0.041708
0.129479	0.052342
0.140609	0.063908
0.150584	0.075072
0.167359	0.086546
0.184383	0.09886
0.200898	0.110322
0.22112	0.12166
0.238032	0.13326
0.25443	0.144944
0.268261	0.156622
0.281564	0.170532
0.294996	0.18112
0.307761	0.192252
0.317028	0.203748
0.329616	0.214264
0.343359	0.225442
0.352872	0.236348
0.367989	0.247698
0.376865	0.25932
0.389985	0.270608
0.39975	0.281914
0.413228	0.294212
0.425206	0.306328
0.433836	0.317098
0.440002	0.328226
0.450699	0.339398
0.459864	0.351126
0.472025	0.362794
0.481998	0.374512
0.490934	0.386094
0.501128	0.397636
0.510487	0.409352
0.517263	0.420284
0.526678	0.431532
0.534891	0.443184
0.542624	0.454586
0.550338	0.466096
0.560276	0.477284
0.567659	0.488398
0.578933	0.499956
0.589854	0.511334
0.597986	0.523368
0.605717	0.534608
0.61465	0.546254
0.621003	0.558794
0.629984	0.571058
0.637719	0.582668
0.643518	0.593908
0.649289	0.605652
0.656088	0.616538
0.662605	0.627708
0.668878	0.639354
0.676545	0.650732
0.683699	0.66241
0.689886	0.67411
0.69675	0.685818
0.702574	0.697894
0.710431	0.710428
0.718589	0.722368
0.723455	0.733294
0.730538	0.744846
0.738081	0.755946
0.741912	0.76749
0.751249	0.780736
0.754578	0.793242
0.761931	0.80488
0.769404	0.817154
0.775927	0.828664
0.779941	0.840102
0.786372	0.851484
0.794872	0.863332
0.799364	0.875668
0.804087	0.888122
0.81095	0.900448
0.815487	0.91213
0.821252	0.923268
0.825225	0.934868
0.832461	0.946094
0.838425	0.957498
0.844486	0.96846
0.84841	0.978924
0.852902	0.989908
0.857915	1
0.995902	1
0.995678	0.989338
0.995887	0.97912
0.994038	0.96898
0.99356	0.958408
0.992627	0.947034
0.991805	0.935878
0.990123	0.925226
0.989294	0.914272
0.988467	0.90422
0.991437	0.89375
0.98949	0.882874
0.986955	0.872888
0.988098	0.86283
0.986892	0.85268
0.984382	0.842054
0.983906	0.831196
0.982985	0.820638
0.982718	0.809034
0.981394	0.798152
0.979858	0.788082
0.978802	0.777528
0.977298	0.76596
0.977199	0.754548
0.976327	0.74342
0.975076	0.732632
0.973223	0.72191
0.973545	0.710902
0.974082	0.700002
0.972275	0.68926
0.971588	0.678424
0.969177	0.667432
0.968735	0.656286
0.966492	0.645498
0.966345	0.63464
0.965956	0.623782
0.964089	0.613026
0.963954	0.602274
0.962539	0.591548
0.961497	0.58085
0.961462	0.570052
0.958943	0.55886
0.957289	0.54744
0.958207	0.536526
0.957367	0.525534
0.955615	0.514538
0.95615	0.503788
0.954449	0.492786
0.952747	0.482052
0.950094	0.471262
0.94828	0.460462
0.950512	0.44965
0.946909	0.438818
0.945906	0.428072
0.945257	0.41713
0.943782	0.406374
0.940277	0.395554
0.940343	0.384794
0.938886	0.374208
0.938841	0.363514
0.935232	0.352016
0.936598	0.340698
0.933885	0.328916
0.930421	0.317648
0.930447	0.306946
0.930363	0.295914
0.928183	0.28444
0.926969	0.273484
0.923698	0.263634
0.924225	0.252942
0.921184	0.241394
0.919948	0.229726
0.919083	0.218262
0.918861	0.20709
0.915162	0.196206
0.917212	0.185526
0.912188	0.174848
0.910779	0.164018
0.908661	0.153216
0.907391	0.142402
0.903612	0.131332
0.900437	0.121382
0.900552	0.111418
0.896768	0.100426
0.895878	0.08902
0.89229	0.077786
0.890505	0.066222
0.88492	0.054678
0.881855	0.043212
0.878606	0.031808
0.875181	0.020216
0.872217	0.008864
0.867421	0
0	0
0	0
-3.21688	-0.05594
-2.89524	-0.051774
-2.55795	-0.0479
-2.19862	-0.04395
-1.85813	-0.040004
-1.51683	-0.036044
-1.10485	-0.032204
-0.598258	-0.028384
-0.212902	-0.02432
-0.0612529	-0.020052
-0.0591486	-0.016074
-0.0448507	-0.01213
-0.0253762	-0.008164
-0.00630396	-0.004118
0	0
0.0188625	0.004076
0.0337844	0.008212
0.0367258	0.012168
0.055125	0.016042
0.0636051	0.020044
0.0593427	0.020044
0.109258	0.020044
0.11493	0.030368
0.121062	0.041422
0.133263	0.052162
0.144999	0.063932
0.159055	0.075474
0.172231	0.087802
0.190089	0.099946
0.207645	0.111316
0.225922	0.122356
0.239434	0.133906
0.254979	0.145442
0.267624	0.156282
0.285207	0.168874
0.302145	0.180882
0.316405	0.191994
0.326897	0.202678
0.335893	0.213342
0.349188	0.223766
0.36423	0.235282
0.373062	0.247152
0.385258	0.258078
0.395405	0.270692
0.404474	0.281078
0.416622	0.292308
0.429352	0.303962
0.43883	0.316826
0.450019	0.328194
0.463417	0.339508
0.469619	0.350576
0.479462	0.362428
0.48794	0.374208
0.496684	0.38548
0.50694	0.39676
0.518604	0.408868
0.527498	0.420252
0.533012	0.430684
0.542796	0.441724
0.550724	0.453088
0.557848	0.464142
0.566915	0.4753
0.57519	0.487178
0.583322	0.498882
0.591166	0.510686
0.600449	0.522944
0.60865	0.534884
0.615443	0.5457
0.625412	0.557888
0.631741	0.570094
0.639157	0.581474
0.645098	0.593324
0.653424	0.60448
0.660129	0.61575
0.664945	0.6267
0.672179	0.638004
0.67838	0.650682
0.688252	0.662278
0.695598	0.673888
0.700532	0.68532
0.708004	0.696324
0.713515	0.708322
0.721284	0.720032
0.729784	0.73138
0.73648	0.74289
0.739778	0.754666
0.74586	0.766216
0.75442	0.779084
0.758857	0.790024
0.765047	0.80134
0.768065	0.812882
0.772353	0.824388
0.780111	0.8359
0.786104	0.847524
0.792226	0.85927
0.797206	0.870208
0.803805	0.881146
0.812064	0.892878
0.816635	0.9043
0.825971	0.916238
0.831585	0.928842
0.835861	0.941306
0.843624	0.952482
0.848557	0.962878
0.853802	0.974692
0.861273	0.986194
0.864581	0.996676
0.870673	1
1.05968	1
1.05915	0.989624
1.05813	0.97959
1.0571	0.969436
1.05659	0.959206
1.05596	0.948334
1.0539	0.936716
1.05256	0.925286
1.05305	0.9138
1.05273	0.902568
1.0533	0.89165
1.05089	0.881302
1.0488	0.869814
1.0485	0.858588
1.04772	0.847918
1.04613	0.837152
1.0483	0.826516
1.04813	0.815928
1.04678	0.80554
1.04396	0.79564
1.04379	0.785294
1.04386	0.774112
1.04167	0.762912
1.0404	0.751566
1.04137	0.74051
1.03879	0.72945
1.03733	0.71831
1.03641	0.707406
1.03537	0.696698
1.03599	0.685886
1.03267	0.67489
1.03208	0.664744
1.02892	0.654108
1.0304	0.644102
1.02884	0.633536
1.02935	0.622708
1.02932	0.61174
1.02798	0.6009
1.02542	0.589794
1.02359	0.578722
1.02297	0.567942
1.02294	0.557118
1.02263	0.546326
1.0205	0.53534
1.01896	0.524338
1.01824	0.513376
1.01962	0.50257
1.01663	0.491682
1.01666	0.480906
1.0146	0.470056
1.01123	0.459018
1.01313	0.448116
1.01166	0.437162
1.00938	0.426528
1.00814	0.415538
1.00547	0.404318
1.00455	0.393796
1.00238	0.383586
1.00162	0.372644
1.00266	0.361822
1.00222	0.350998
1.00178	0.340096
1.00031	0.329398
0.996459	0.318328
0.994634	0.30744
0.995366	0.296558
0.994209	0.285658
0.992394	0.274884
0.990409	0.26391
0.989734	0.253124
0.988027	0.242348
0.987332	0.231452
0.984632	0.220632
0.982931	0.209766
0.980078	0.198842
0.978616	0.187934
0.977516	0.176934
0.974706	0.166066
0.972291	0.155174
0.969992	0.144258
0.966441	0.132852
0.96495	0.121282
0.963856	0.110526
0.96227	0.099696
0.959595	0.089272
0.956797	0.079256
0.952982	0.068598
0.949992	0.057808
0.946349	0.046946
0.944159	0.03608
0.940146	0.025054
0.934985	0.014164
0.931718	0.00319
0.928833	0
0	0
0	0
-3.23709	-0.055804
-2.92354	-0.051652
-2.59389	-0.047764
-2.1096	-0.044076
-1.66313	-0.03987
-1.2742	-0.03596
-0.93295	-0.032002
-0.58183	-0.027996
-0.179552	-0.023986
-0.0746064	-0.020046
-0.0440355	-0.016184
-0.0288909	-0.012134
-0.0226255	-0.008092
-0.01245	-0.00406
0	0
0.0157634	0.003984
0.0234745	0.007886
0.0318833	0.011844
0.0403139	0.015806
0.052643	0.019778
0.0710854	0.02
0.113511	0.020002
0.117588	0.030786
0.123773	0.041908
0.136268	0.05239
0.139684	0.063516
0.155352	0.073738
0.171812	0.08477
0.18523	0.096386
0.197755	0.107808
0.217203	0.11885
0.235603	0.130308
0.251953	0.141464
0.266617	0.153
0.281126	0.165762
0.29247	0.176694
0.304454	0.188002
0.316644	0.199824
0.328478	0.210194
0.338482	0.221462
0.348512	0.23273
0.361545	0.24454
0.372436	0.25588
0.383462	0.26694
0.396283	0.278628
0.409314	0.290858
0.421	0.301866
0.434075	0.313172
0.442867	0.324714
0.454063	0.336134
0.464348	0.34799
0.473533	0.360186
0.481196	0.37248
0.489581	0.383672
0.49891	0.395158
0.512628	0.407662
0.522525	0.419032
0.532651	0.430498
0.536829	0.441768
0.542928	0.452894
0.551764	0.464196
0.558427	0.47547
0.567846	0.487144
0.575043	0.498504
0.584066	0.50965
0.591293	0.520536
0.597751	0.532084
0.606191	0.54358
0.612048	0.55531
0.621415	0.566364
0.62768	0.57747
0.634111	0.58906
0.643678	0.600576
0.650316	0.61355
0.65731	0.625662
0.666718	0.63745
0.67391	0.649092
0.682608	0.661682
0.691632	0.675106
0.697262	0.68587
0.703998	0.69767
0.711547	0.70965
0.717785	0.72128
0.723344	0.732858
0.729545	0.74446
0.73692	0.755944
0.742751	0.767598
0.751139	0.780284
0.756163	0.791262
0.761166	0.802806
0.767326	0.814424
0.771403	0.825858
0.779738	0.836998
0.784552	0.848748
0.789455	0.860426
0.797074	0.872074
0.801678	0.884038
0.809437	0.89571
0.816893	0.907452
0.822001	0.919278
0.826501	0.930422
0.831476	0.94225
0.840798	0.954444
0.84548	0.966138
0.850008	0.978352
0.85539	0.989888
0.860055	1
1.10295	1
1.10164	0.989572
1.10065	0.979808
1.09893	0.969638
1.09856	0.95949
1.09879	0.949836
1.09918	0.938028
1.09688	0.927322
1.09507	0.916562
1.09426	0.905724
1.09525	0.894784
1.09351	0.883756
1.09236	0.873096
1.09191	0.862634
1.09093	0.85183
1.08895	0.84079
1.08991	0.83018
1.08752	0.819052
1.09053	0.808876
1.08797	0.798602
1.08526	0.788576
1.08291	0.777948
1.08256	0.767032
1.08099	0.75612
1.0817	0.745078
1.0806	0.734316
1.07817	0.723804
1.07801	0.712794
1.07488	0.70188
1.07503	0.690844
1.07487	0.679914
1.07343	0.66912
1.07514	0.658302
1.07315	0.647356
1.0698	0.636478
1.07102	0.625426
1.06993	0.614496
1.06822	0.603746
1.06537	0.592818
1.06672	0.581878
1.0647	0.57075
1.06385	0.559714
1.06467	0.548608
1.06238	0.537606
1.06149	0.526674
1.05802	0.515742
1.05672	0.504802
1.05725	0.493798
1.05461	0.482798
1.0552	0.471774
1.05653	0.460866
1.05492	0.449936
1.05038	0.439112
1.05163	0.428168
1.05132	0.417244
1.05012	0.406296
1.04859	0.395364
1.04603	0.384362
1.04519	0.373398
1.04279	0.36217
1.04236	0.351384
1.04098	0.3406
1.03876	0.329822
1.03729	0.318784
1.03709	0.308092
1.03625	0.297688
1.03275	0.287638
1.03241	0.277218
1.03135	0.266276
1.02953	0.255394
1.02915	0.244392
1.02695	0.233412
1.0265	0.222508
1.02249	0.211544
1.02043	0.200652
1.01687	0.189876
1.01684	0.178798
1.01328	0.167948
1.01201	0.157098
1.0101	0.14623
1.00829	0.135382
1.00628	0.124798
1.00275	0.114656
1.0005	0.10421
0.997737	0.093278
0.996372	0.082506
0.993022	0.071562
0.991389	0.06061
0.986255	0.049708
0.983618	0.03851
0.980662	0.027776
0.976535	0.016884
0.972935	0.005986
0.96855	0
0	0
0	0
-3.26259	-0.05583
-3.02143	-0.051848
-2.68386	-0.047828
-2.25897	-0.044062
-1.77289	-0.040058
-1.3342	-0.036044
-0.988457	-0.03211
-0.642312	-0.02805
-0.267716	-0.023964
-0.0616848	-0.01993
-0.0465321	-0.01604
-0.0414289	-0.012062
-0.0302903	-0.00811
-0.0161815	-0.00395
0	0
0.00541165	0.003912
0.0217505	0.007918
0.0371659	0.011818
0.0512204	0.015996
0.0612846	0.02011
0.0582028	0.02011
0.116166	0.020112
0.12204	0.031024
0.132749	0.04238
0.144213	0.054138
0.149476	0.065666
0.163975	0.076278
0.182207	0.08863
0.197696	0.101676
0.216238	0.112726
0.237799	0.125156
0.254239	0.136048
0.269257	0.147396
0.28336	0.159174
0.29458	0.171726
0.30778	0.182574
0.324037	0.193422
0.335194	0.205068
0.346038	0.216184
0.356246	0.226688
0.371571	0.23912
0.384811	0.252296
0.396979	0.26463
0.412706	0.276572
0.424041	0.288896
0.434006	0.30082
0.442454	0.312258
0.453068	0.32366
0.463311	0.335656
0.472964	0.346748
0.481354	0.357664
0.490793	0.36892
0.499838	0.380166
0.511028	0.391862
0.515628	0.403278
0.52548	0.414948
0.536031	0.427262
0.546289	0.439526
0.554791	0.450656
0.561196	0.461632
0.572247	0.473278
0.577196	0.484988
0.586195	0.495962
0.592721	0.507552
0.603641	0.519296
0.609995	0.531028
0.619582	0.5427
0.62682	0.554376
0.637508	0.566098
0.642199	0.5778
0.64905	0.58918
0.656511	0.601072
0.664341	0.612864
0.671839	0.624756
0.679504	0.636778
0.686441	0.648776
0.694335	0.660568
0.702114	0.672616
0.707912	0.683462
0.716079	0.695498
0.721121	0.706532
0.72882	0.718198
0.734353	0.729522
0.741721	0.741486
0.747756	0.753708
0.752773	0.765206
0.76153	0.777244
0.766417	0.78846
0.774167	0.799476
0.779197	0.810636
0.787298	0.823144
0.792253	0.835014
0.799366	0.846518
0.804825	0.857754
0.807923	0.869074
0.816973	0.88042
0.821479	0.891938
0.828126	0.903236
0.83479	0.914842
0.842447	0.926484
0.847882	0.937988
0.851053	0.949764
0.85872	0.962078
0.866688	0.97436
0.872991	0.986392
0.877322	0.997682
0.881531	1
1.1212	1
1.12052	0.989426
1.11966	0.979424
1.12061	0.969406
1.11803	0.95942
1.11784	0.948862
1.11585	0.937796
1.11574	0.926882
1.11391	0.915898
1.1132	0.905054
1.11444	0.894138
1.11374	0.88304
1.11225	0.872212
1.11103	0.861478
1.10885	0.85053
1.10947	0.839794
1.11041	0.828854
1.10943	0.81787
1.10928	0.806902
1.10679	0.79682
1.10497	0.78681
1.10695	0.77625
1.10404	0.765384
1.10396	0.754866
1.10314	0.743608
1.10324	0.732066
1.10072	0.720642
1.0981	0.709024
1.09771	0.697506
1.09853	0.686122
1.09654	0.674608
1.09449	0.66399
1.09323	0.653238
1.09146	0.642374
1.09175	0.632404
1.09081	0.622342
1.0895	0.611716
1.0873	0.601342
1.0883	0.590794
1.08784	0.580244
1.08736	0.569784
1.08378	0.559
1.08328	0.548022
1.08472	0.537176
1.08417	0.52636
1.08306	0.515294
1.08291	0.50444
1.07958	0.49356
1.07894	0.48227
1.07568	0.471198
1.07755	0.460246
1.07532	0.449412
1.07311	0.43843
1.07216	0.427614
1.07287	0.416794
1.06958	0.405856
1.06812	0.39507
1.06699	0.384046
1.06726	0.372804
1.06479	0.36179
1.06498	0.351068
1.06495	0.340226
1.06147	0.32941
1.06194	0.31875
1.06088	0.30799
1.05756	0.297056
1.05769	0.286288
1.05558	0.275734
1.05436	0.264994
1.05116	0.254296
1.04963	0.243534
1.05037	0.232788
1.04737	0.22196
1.04642	0.211134
1.0443	0.200454
1.04384	0.189602
1.03955	0.179026
1.03932	0.168102
1.03624	0.157266
1.03414	0.146598
1.03397	0.135752
1.03169	0.124762
1.02974	0.114036
1.02547	0.1033
1.02356	0.092592
1.01935	0.081744
1.01865	0.071164
1.0121	0.060296
1.00829	0.049462
1.00585	0.038578
1.00262	0.027808
1.00033	0.01695
0.997119	0.006274
0.99403	0
0	0
0	0
-3.33109	-0.056282
-2.99624	-0.052166
-2.73993	-0.047902
-2.42464	-0.044
-1.96408	-0.040036
-1.52724	-0.036034
-1.11364	-0.03209
-0.716918	-0.028168
-0.377381	-0.02391
-0.0807049	-0.01978
-0.0415928	-0.015794
-0.0392782	-0.011876
-0.0203322	-0.008042
-0.00823595	-0.004066
0	0
0.0201017	0.003874
0.0235195	0.008018
0.0325713	0.012124
0.0481981	0.016046
0.0587712	0.02013
0.0559952	0.02013
0.120052	0.02013
0.124324	0.030504
0.131314	0.041506
0.142642	0.052254
0.156578	0.06424
0.17214	0.075222
0.187578	0.086408
0.203056	0.097182
0.221394	0.108034
0.239587	0.11937
0.256354	0.131372
0.269118	0.143372
0.283036	0.15558
0.297087	0.167368
0.307524	0.178576
0.320513	0.189794
0.332619	0.20053
0.340784	0.211138
0.353133	0.221544
0.368059	0.2324
0.382425	0.243902
0.393489	0.255582
0.403934	0.267386
0.41507	0.2788
0.427344	0.290366
0.436004	0.301922
0.44566	0.314352
0.4549	0.325352
0.463606	0.337178
0.475969	0.349752
0.487169	0.361648
0.494505	0.372974
0.503439	0.384348
0.509686	0.395488
0.520533	0.407812
0.529554	0.41966
0.536491	0.43081
0.547277	0.44204
0.553818	0.453234
0.561095	0.464972
0.572119	0.477186
0.580862	0.488906
0.588252	0.501496
0.597571	0.51235
0.605143	0.52345
0.614578	0.535192
0.618703	0.547492
0.626251	0.558772
0.6332	0.571364
0.640103	0.582196
0.647009	0.593986
0.652501	0.606968
0.660784	0.618994
0.667461	0.63084
0.673228	0.641818
0.680808	0.65347
0.687272	0.665156
0.693004	0.676794
0.699009	0.68878
0.708014	0.700474
0.713579	0.711792
0.720377	0.724144
0.726938	0.736138
0.731824	0.74713
0.739753	0.759352
0.744338	0.771896
0.752183	0.785192
0.76155	0.795782
0.766065	0.80698
0.771558	0.818404
0.777663	0.829854
0.779809	0.841454
0.788029	0.852954
0.794531	0.86394
0.799386	0.87593
0.806013	0.88738
0.812182	0.898364
0.81867	0.910082
0.821676	0.921784
0.827662	0.934324
0.834119	0.94578
0.840981	0.957578
0.847391	0.969998
0.853679	0.982348
0.856881	0.993652
0.862629	1
1.14989	0.999998
1.15078	0.989508
1.15137	0.979028
1.1498	0.968522
1.1496	0.958334
1.1476	0.94838
1.14663	0.936156
1.14531	0.925244
1.144	0.914202
1.14179	0.903204
1.14121	0.892562
1.14189	0.88247
1.1424	0.871666
1.1416	0.860422
1.14068	0.848962
1.13986	0.837576
1.13814	0.826254
1.13867	0.814984
1.13758	0.8045
1.13817	0.794546
1.13589	0.784186
1.13452	0.772984
1.1318	0.762394
1.13298	0.751772
1.13272	0.740204
1.13254	0.728814
1.12981	0.717176
1.12916	0.706192
1.1285	0.695766
1.12716	0.684894
1.12825	0.674084
1.12438	0.663186
1.12417	0.65237
1.12272	0.64175
1.1215	0.630346
1.12057	0.618786
1.11891	0.607408
1.11837	0.596732
1.11552	0.586018
1.1128	0.575178
1.11422	0.564596
1.11375	0.553716
1.11392	0.542956
1.11092	0.531972
1.10948	0.52119
1.10805	0.510308
1.10761	0.499654
1.10546	0.488758
1.10599	0.478382
1.10266	0.468484
1.10279	0.457844
1.10288	0.44723
1.10217	0.436246
1.10113	0.425238
1.09865	0.414312
1.09843	0.403442
1.09759	0.39262
1.09368	0.381792
1.09179	0.370822
1.09053	0.360042
1.0893	0.349018
1.0884	0.33809
1.08651	0.327178
1.08291	0.31628
1.08225	0.305206
1.0811	0.294274
1.07951	0.283384
1.07912	0.272196
1.07816	0.26117
1.07429	0.250176
[truncated: 18,230 more rows]
